# Supplementary material for: Trifluoroacetylazobenzene for optical and electrochemical detection of amines
Source: Royal Society of Chemistry journal article supplement (doi:10.1039/c4ta05358c), 2015-01-01
Supplement: c4ta05358c1.pdf [file c4ta05358c1.pdf]

## Supplementary information to “Trifluoroacetylazobenzene for optical and electrochemical detection of amines” by Jhih-Fong Lin et al.

### **<sup>1</sup>H-NMR and <sup>13</sup>C-NMR spectroscopy analyses**

The dye amine adduct were characterized using nuclear magnetic resonance spectroscopy (NMR) Bruker AV 400. <sup>1</sup>H NMR and <sup>13</sup>C NMR spectra were recorded on a Bruker DRX-400 and calibrated using the residual peak of solvents as an internal standard [CDCl<sub>3</sub> (CHCl<sub>3</sub> δH 7.26 ppm, CDCl<sub>3</sub> δC 77.0 ppm). The dye was dissolved in CDCl<sub>3</sub> and different concentration of amine was added. Spectrum was taken 20 min after addition.

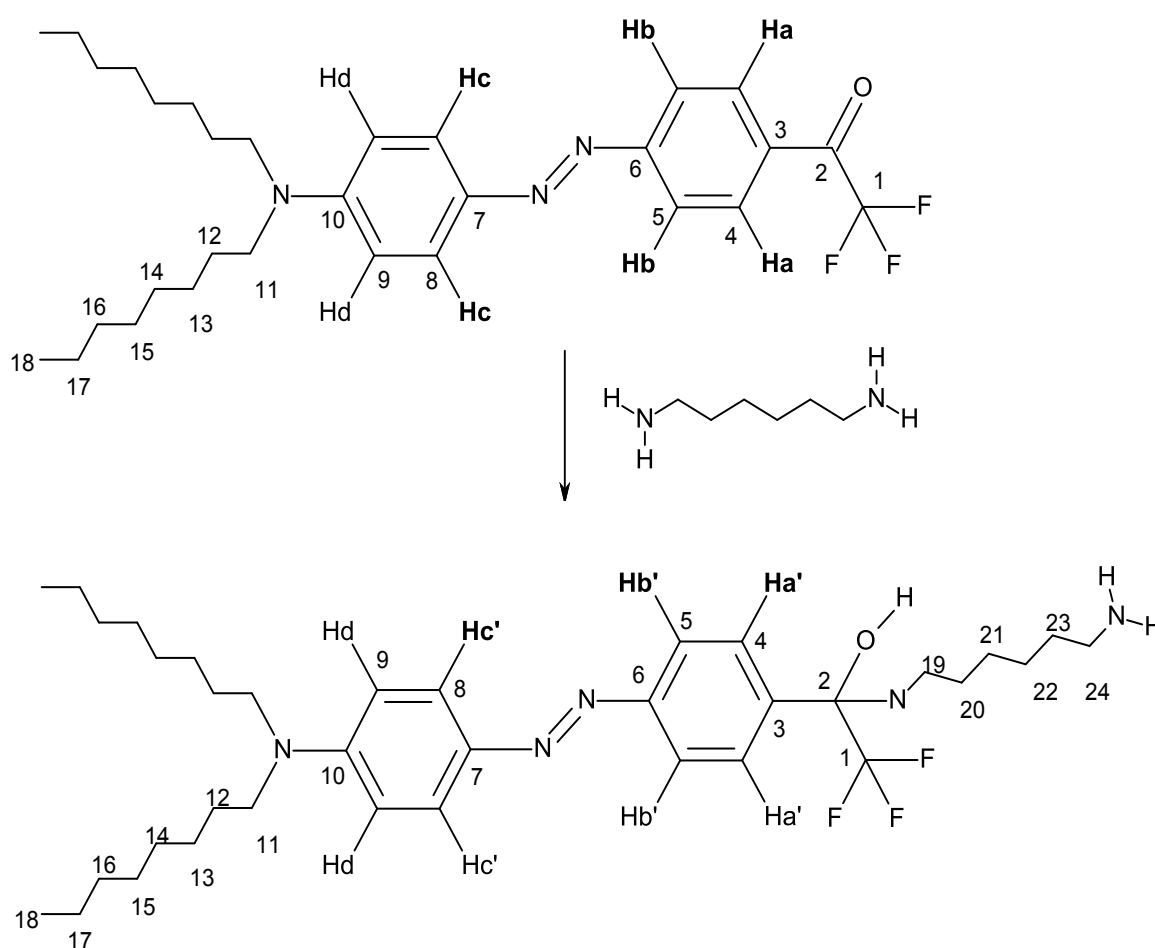

**Scheme S1**

The reaction of dye with different amines (cadaverine, putrescine, ethylamine and ammonia) was also Ha (δ ppm 8.16 ), Hb and Hc (δ ppm 7.87-7.92) protons of dye undergoes upfield shift upon reaction with the amine (for <sup>1</sup>H-NMR and <sup>13</sup>C-NMR spectra see data 1.1-1.25). New Ha', Hb' and Hc' in the dye amine adduct appeared in the range δ ppm 7.78-7.40.<sup>1</sup>

Imine or carbinolamine or aminal are the three possible products in the reaction of dye with amine. The study of <sup>13</sup>C-NMR of the dye and dye adduct indicates the carbinolamine formation. The quartet of carbonyl carbon at 180 ppm in the dye disappeared in the dye adduct and replaced by new quartet at 86 ppm for

carbinolamine in the adduct spectrum. This corroborates with the results reported by Mertz *et al.* (Table 2).<sup>1</sup> The imine carbon is expected to give quartet around 150 ppm.<sup>2</sup>

We determined the percentage of product (dye and amine adducts, amines: cadaverine, putrescine and ethylamine) and dye in the reaction mixture from integration values of hydrogens of the dye and product (**Table 1**).

Note, that product formation during the reaction of dye with ammonia even at high concentration of ammonia could not be detected.

**Table S1 Peak and integration values**

| Peak                                                                                      | 8.16 (d, J= 8Hz)<br>Expected<br>integration : 2<br>hydrogens (Ha<br>protons) | 7.87-7.92<br>Expected<br>integration : 4<br>hydrogens<br>(Hb and Hc<br>protons) | 7.78-7.40<br>Expected integration<br>: 6 hydrogens<br>(Ha', Hb', Hc'<br>protons) |
|-------------------------------------------------------------------------------------------|------------------------------------------------------------------------------|---------------------------------------------------------------------------------|----------------------------------------------------------------------------------|
| <b>Compound</b>                                                                           |                                                                              |                                                                                 |                                                                                  |
| Dye                                                                                       | 2                                                                            | 4                                                                               | 0                                                                                |
| Dye + cadaverine (1:0.5 molar eqv.)                                                       | 1.79(89.64%)                                                                 | 3.56(89.02%)                                                                    | 0.75 (12.48%)                                                                    |
| Dye + cadaverine (1:1 molar eqv.)                                                         | 1.50 (74.92%)                                                                | 3.02 (75.41%)                                                                   | 1.42 (23.63%)                                                                    |
| Dye + cadaverine (1:1.5 molar eqv.)                                                       | 1.26 (63.00%)                                                                | 2.53 (63.25%)                                                                   | 2.19 (36.50%)                                                                    |
| Dye + cadaverine (1:2 molar eqv.)                                                         | 1.04 (52.00%)                                                                | 2.13 (53.25%)                                                                   | 2.75 (45.83%)                                                                    |
| Dye + cadaverine (1:3 molar eqv.)                                                         | 0.91 (45.50%)                                                                | 1.89 (47.25%)                                                                   | 3.15 (52.50%)                                                                    |
| Dye + cadaverine (1:4 molar eqv.)                                                         | 0.72 (36.00%)                                                                | 1.49 (37.25%)                                                                   | 3.75 (62.50%)                                                                    |
| Dye + cadaverine (1:8 molar eqv.)                                                         | 0                                                                            | 0                                                                               | 6 (100%)                                                                         |
| Dye + putrescine (1:0.5 molar eqv.)                                                       | 1.76 (88.00%)                                                                | Two peaks are not separated                                                     |                                                                                  |
| Dye + putrescine (1:1 molar eqv.)                                                         | 1.56 (78.00%)                                                                |                                                                                 |                                                                                  |
| Dye + putrescine (1:2 molar eqv.)                                                         | 0.47 (23.5%)                                                                 |                                                                                 |                                                                                  |
| Dye + putrescine (1:2.5 molar eqv.)                                                       | 0.35 (17.50%)                                                                |                                                                                 |                                                                                  |
| Dye + putrescine (1:3 molar eqv.)                                                         | 0.34 (17.00%)                                                                |                                                                                 |                                                                                  |
| Dye + putrescine (1:8 molar eqv.)                                                         | 0                                                                            | 0                                                                               | 6 (100%)                                                                         |
| Dye + ethyl amine (1:0.5 molar eqv.)                                                      | 1.96 (98.00%)                                                                | 3.91 (97.75)                                                                    | 0.13 (21.70%)                                                                    |
| Dye + ethyl amine (1:1 molar eqv.)                                                        | 1.91 (95.50%)                                                                | 3.79 (94.75%)                                                                   | 0.27 (4.50%)                                                                     |
| Dye + ethyl amine (1:2 molar eqv.)                                                        | 1.80 (90.00%)                                                                | 3.57 (89.25)                                                                    | 0.64 (10.66)                                                                     |
| Dye + ethyl amine (1:3 molar eqv.)                                                        | 1.74 (87.00%)                                                                | 3.47 (86.75)                                                                    | 0.76 (12.67)                                                                     |
| Dye + ethyl amine (1:4 molar eqv.)                                                        | 1.62 (81.00%)                                                                | 3.26 (81.50%)                                                                   | 1.03 (17.16%)                                                                    |
| Dye + ethyl amine (1:8 molar eqv.)                                                        | 1.54 (77.00%)                                                                | 3.08 (77.00%)                                                                   | 1.35 (22.50%)                                                                    |
| Percentage of dye in reaction mixture= (integration of Ha peak/2)* 100                    |                                                                              |                                                                                 |                                                                                  |
| Percentage of dye in reaction mixture = (integration of Hb and Hc peak/4)* 100            |                                                                              |                                                                                 |                                                                                  |
| Percentage of product in reaction mixture = (integration of Ha', Hb' and Hc' peak/6)* 100 |                                                                              |                                                                                 |                                                                                  |

**Table S2 <sup>13</sup>C chemical shifts of dye and dye adduct**

| Carbon | δppm of carbon                 |                                |
|--------|--------------------------------|--------------------------------|
|        | Dye                            | Dye cadaverine adduct          |
| 1      | 111.39, 115.56, 118.46, 122.65 | 121.25, 125.09, 128.79, 142.85 |
| 2      | 179.5, 179.85, 180.20, 180.54  | 85.90, 86.19, 86.47, 86.76     |
| 3      | 131.53                         | 137.37                         |
| 4      | 131.52                         | 125.09                         |
| 5      | 129.33                         | 121.25                         |
| 6      | 151.83                         | 150.40                         |
| 7      | 143.57                         | 142.85                         |
| 8      | 126.65                         | 125.09                         |
| 9      | 111.39                         | 110.78                         |
| 10     | 157.79                         | 153.24                         |
| 11     | 51.51                          | 50.89                          |
| 12     | 31.99                          | 31.57                          |
| 13     | 29.62                          | 29.22                          |
| 14     | 29.47                          | 29.06                          |
| 15     | 27.47                          | 26.87                          |
| 16     | 27.27                          | 26.87                          |
| 17     | 22.83                          | 22.41                          |
| 18     | 14.28                          | 13.87                          |
| 19     | --                             | 41.37                          |
| 20     | --                             | 23.97                          |
| 21     | --                             |                                |
| 22     | --                             |                                |
| 23     | --                             |                                |
| 24     | --                             | 33.46                          |

# 1.1 <sup>1</sup>H NMR Spectrum of Dye

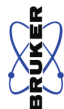

Dye

8.181  
8.161  
8.124  
7.928  
7.911  
7.906  
7.898  
7.875  
7.875  
7.260  
6.707  
6.684

3.398  
3.379  
3.359  
2.007  
1.648  
1.630  
1.351  
1.342  
1.317  
1.291  
0.911  
0.894  
0.877

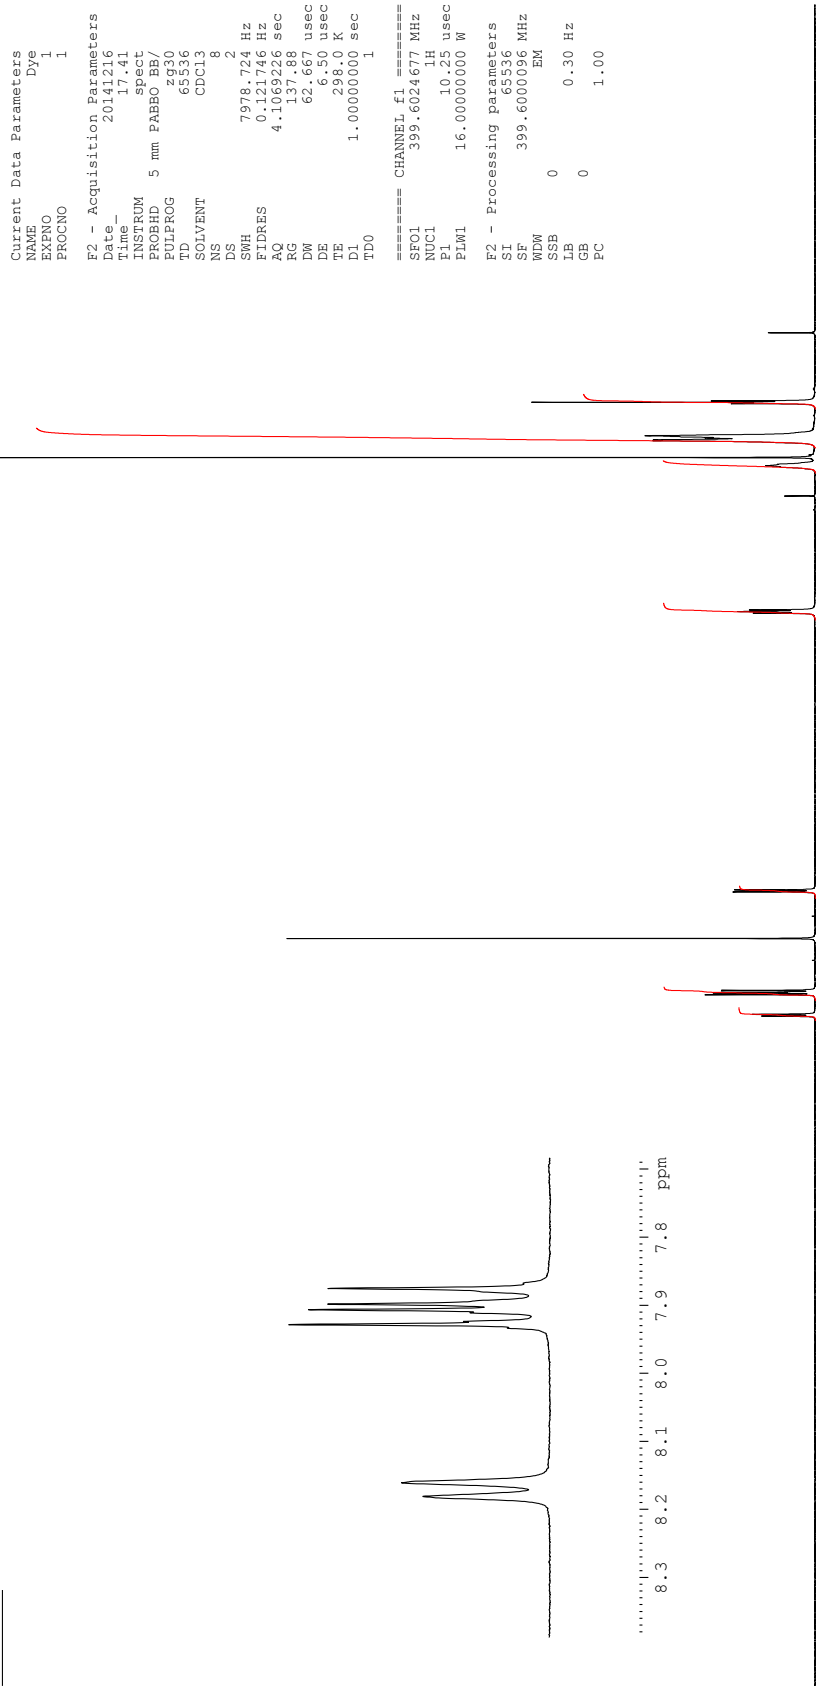

15 14 13 12 11 10 9 8 7 6 5 4 3 2 1 0 -1 -2 ppm

6.13  
20.59  
4.03  
4.01  
2.00  
4.00  
2.02

Current Data Parameters  
 Name Dye  
 EXPNO 1  
 PROCNO 1

F2 - Acquisition Parameters  
 Date\_ 20141216  
 Time 17.41  
 INSTRUM spect  
 PROBHD 5 mm FAPBQ BB/  
 PULPROG zg30  
 ID 65536  
 SOLVENT CDCl3  
 NS 6  
 DS 2  
 SWH 7978.724 Hz  
 FIDRES 0.121746 Hz  
 AQ 4.11069226 sec  
 RG 137.88  
 DW 62.667 usec  
 DE 6.50 usec  
 TE 298.0 K  
 D1 1.00000000 sec  
 TD0 1

==== CHANNEL f1 =====  
 SFO1 399.6024677 MHz  
 NUC1 1H  
 P1 10.25 usec  
 PLW1 16.00000000 W

F2 - Processing parameters  
 SI 65536  
 SF 399.6000096 MHz  
 SSB 0 EM  
 LB 0  
 GB 0  
 PC 1.00

# 1.2 <sup>13</sup>C NMR Spectrum of Dye

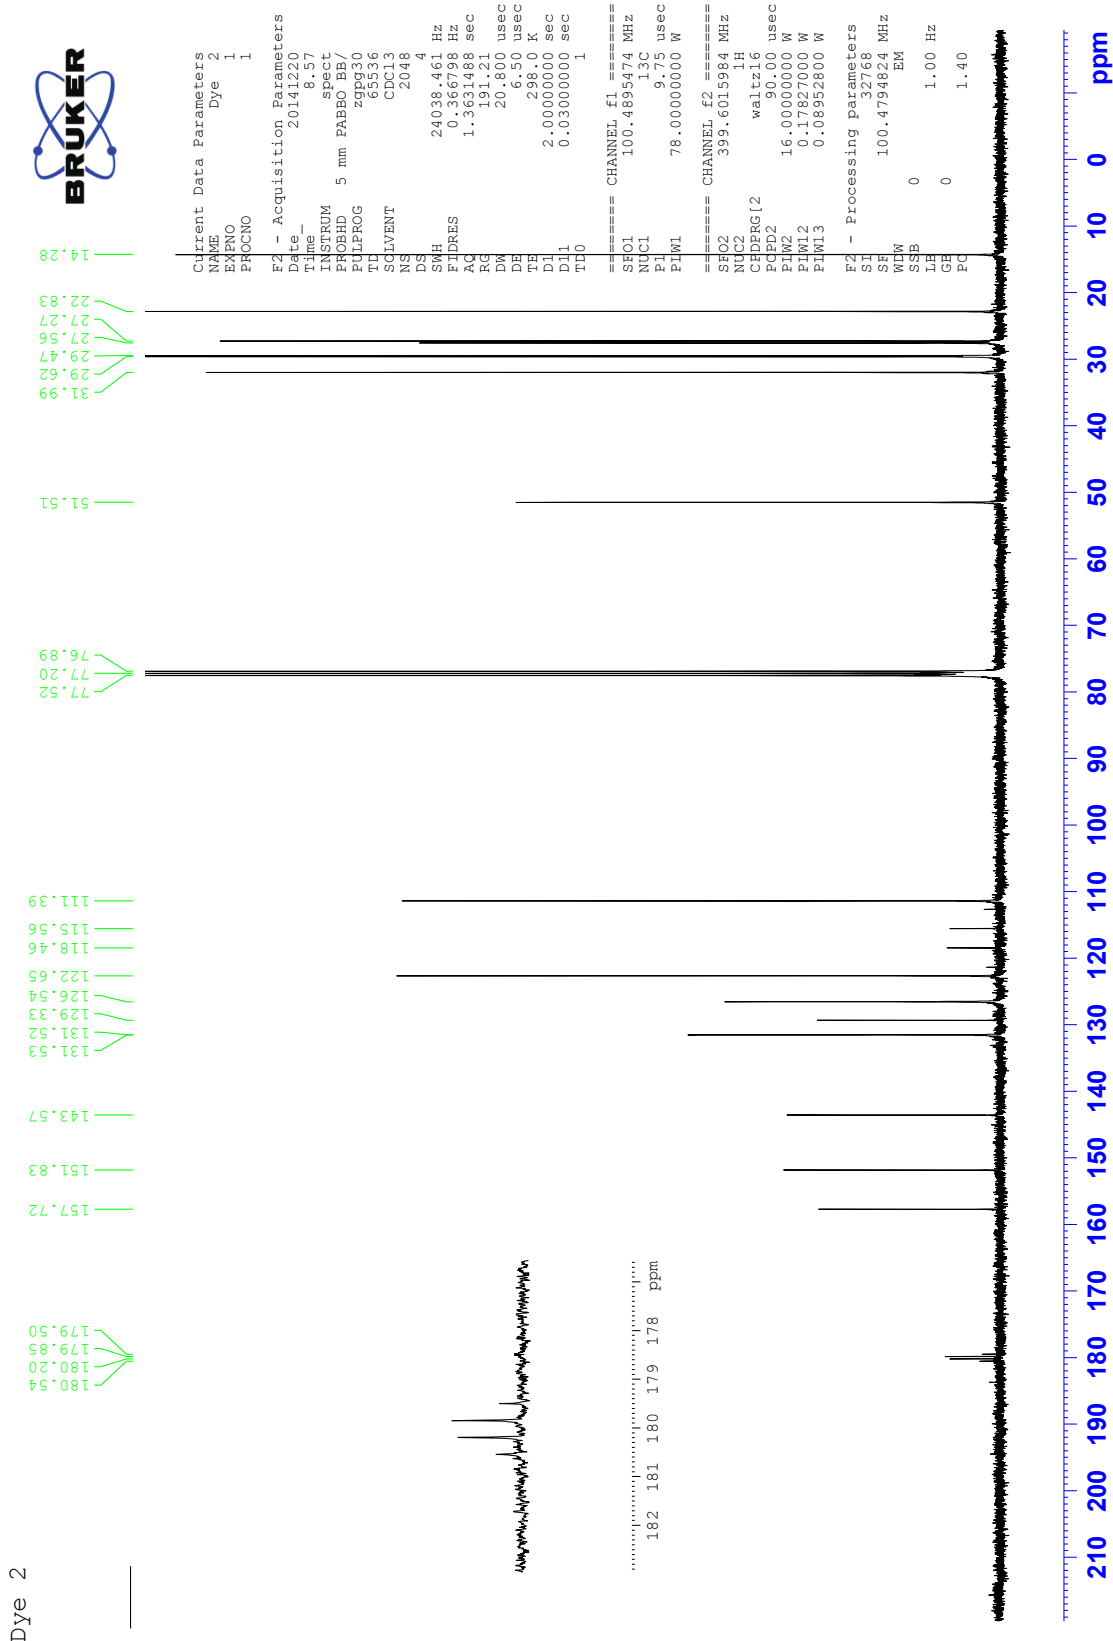

1.3 <sup>1</sup>H NMR Spectrum of Dye + cadaverine (1:8 eqv.) (spectrum taken after 20 min)

Dye+cadaverine 8.0\_11mg

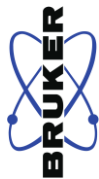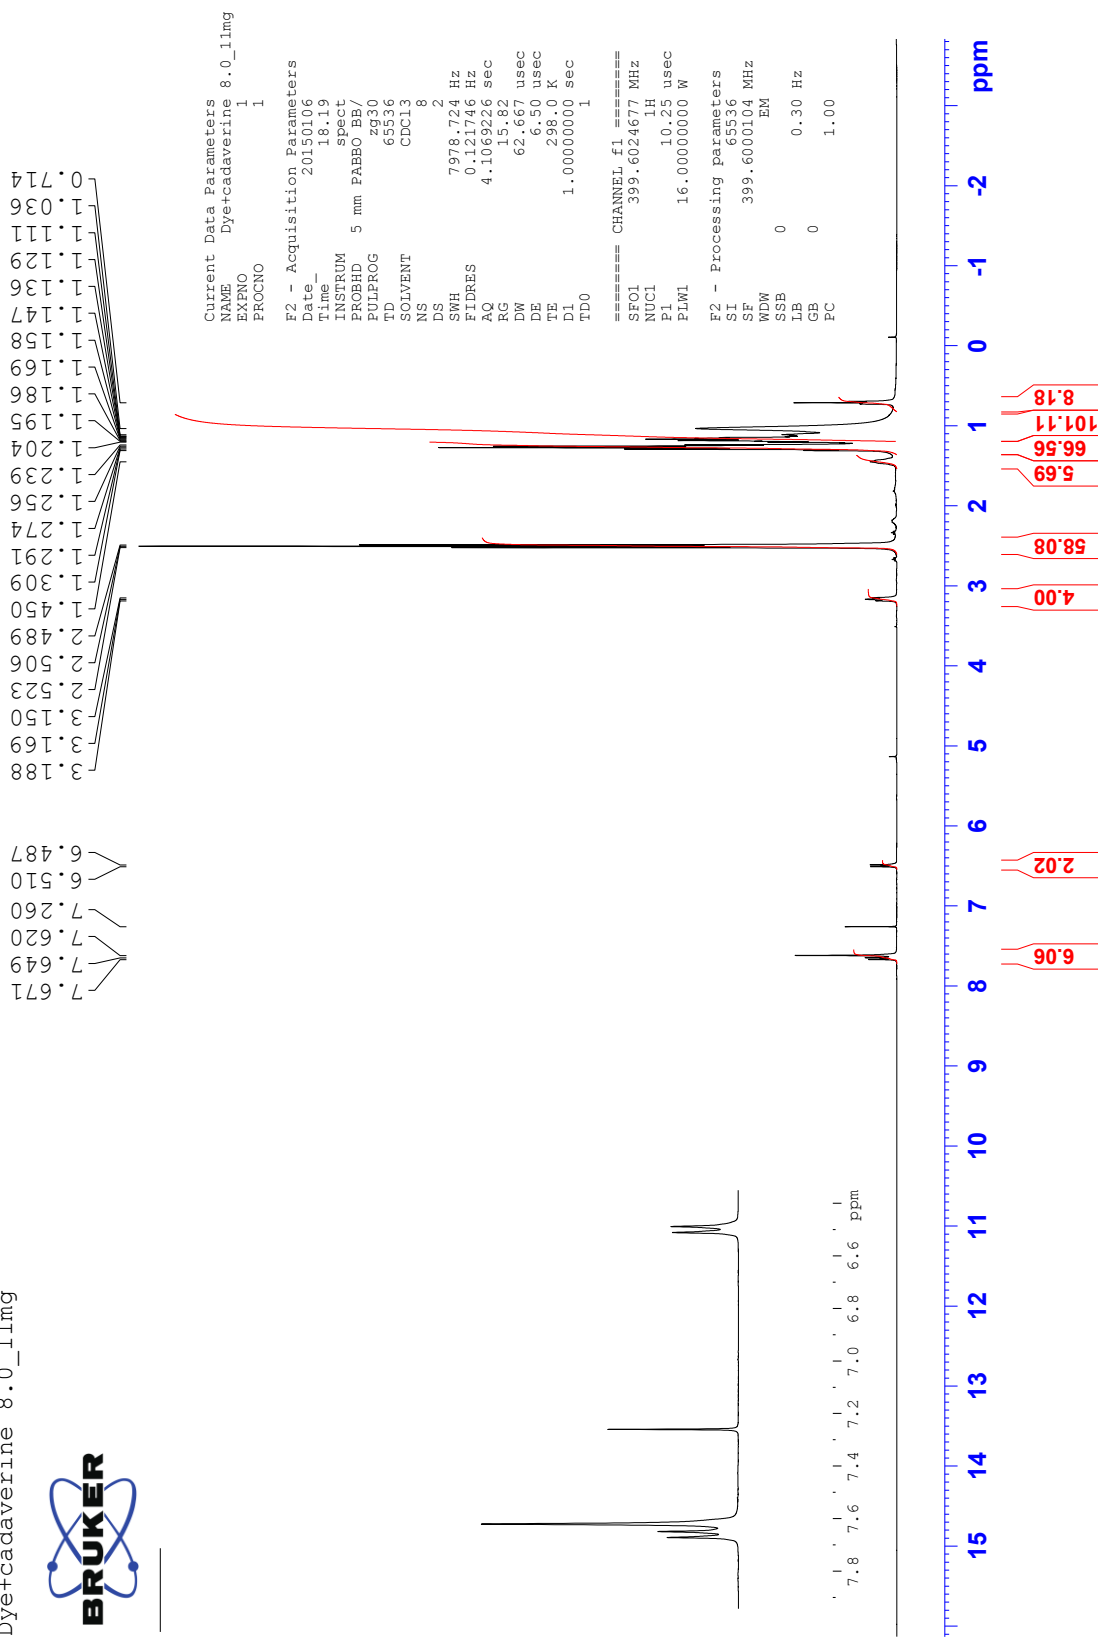

1.4<sup>13</sup> C NMR Spectrum of Dye + cadaverine (1:8 eqv.) (spectrum taken after 4 h).

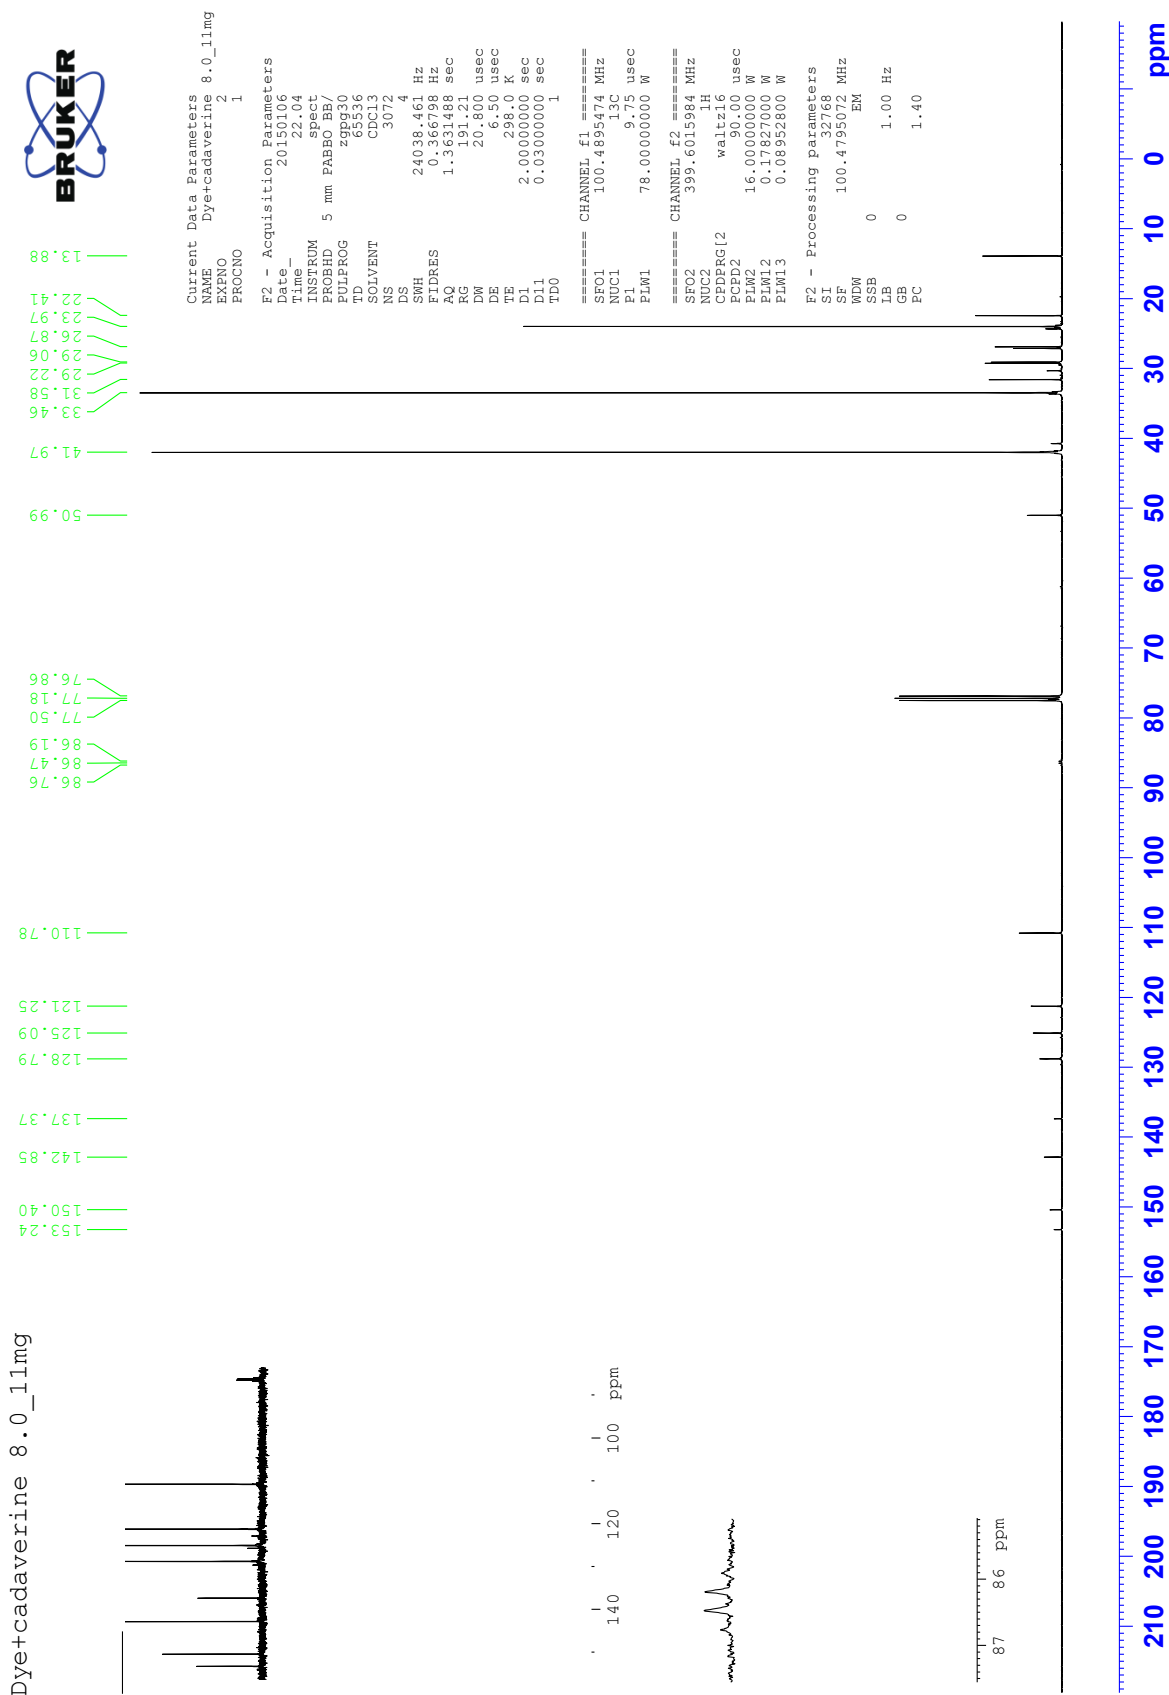

1.5 <sup>1</sup>H NMR Spectrum of Dye + cadaverine (1:0.5 eqv.) (spectrum taken after 20 min)

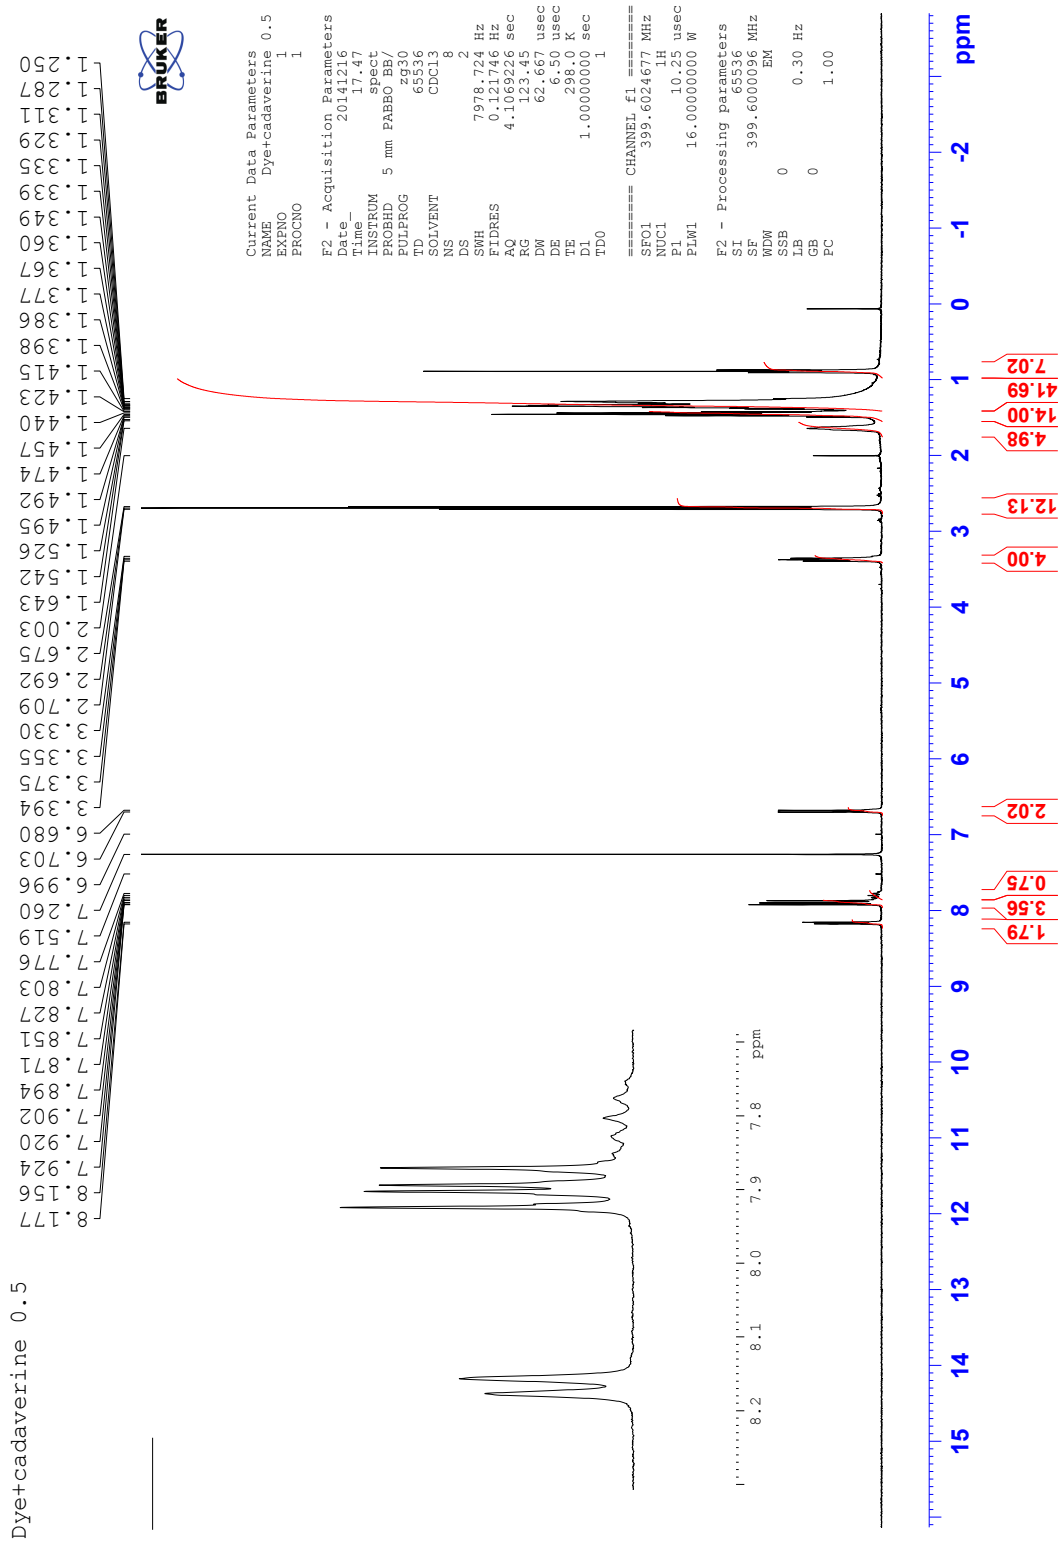



1.6 <sup>1</sup>H NMR Spectrum of Dye + cadaverine (1:1 eqv.) (spectrum taken after 20 min)

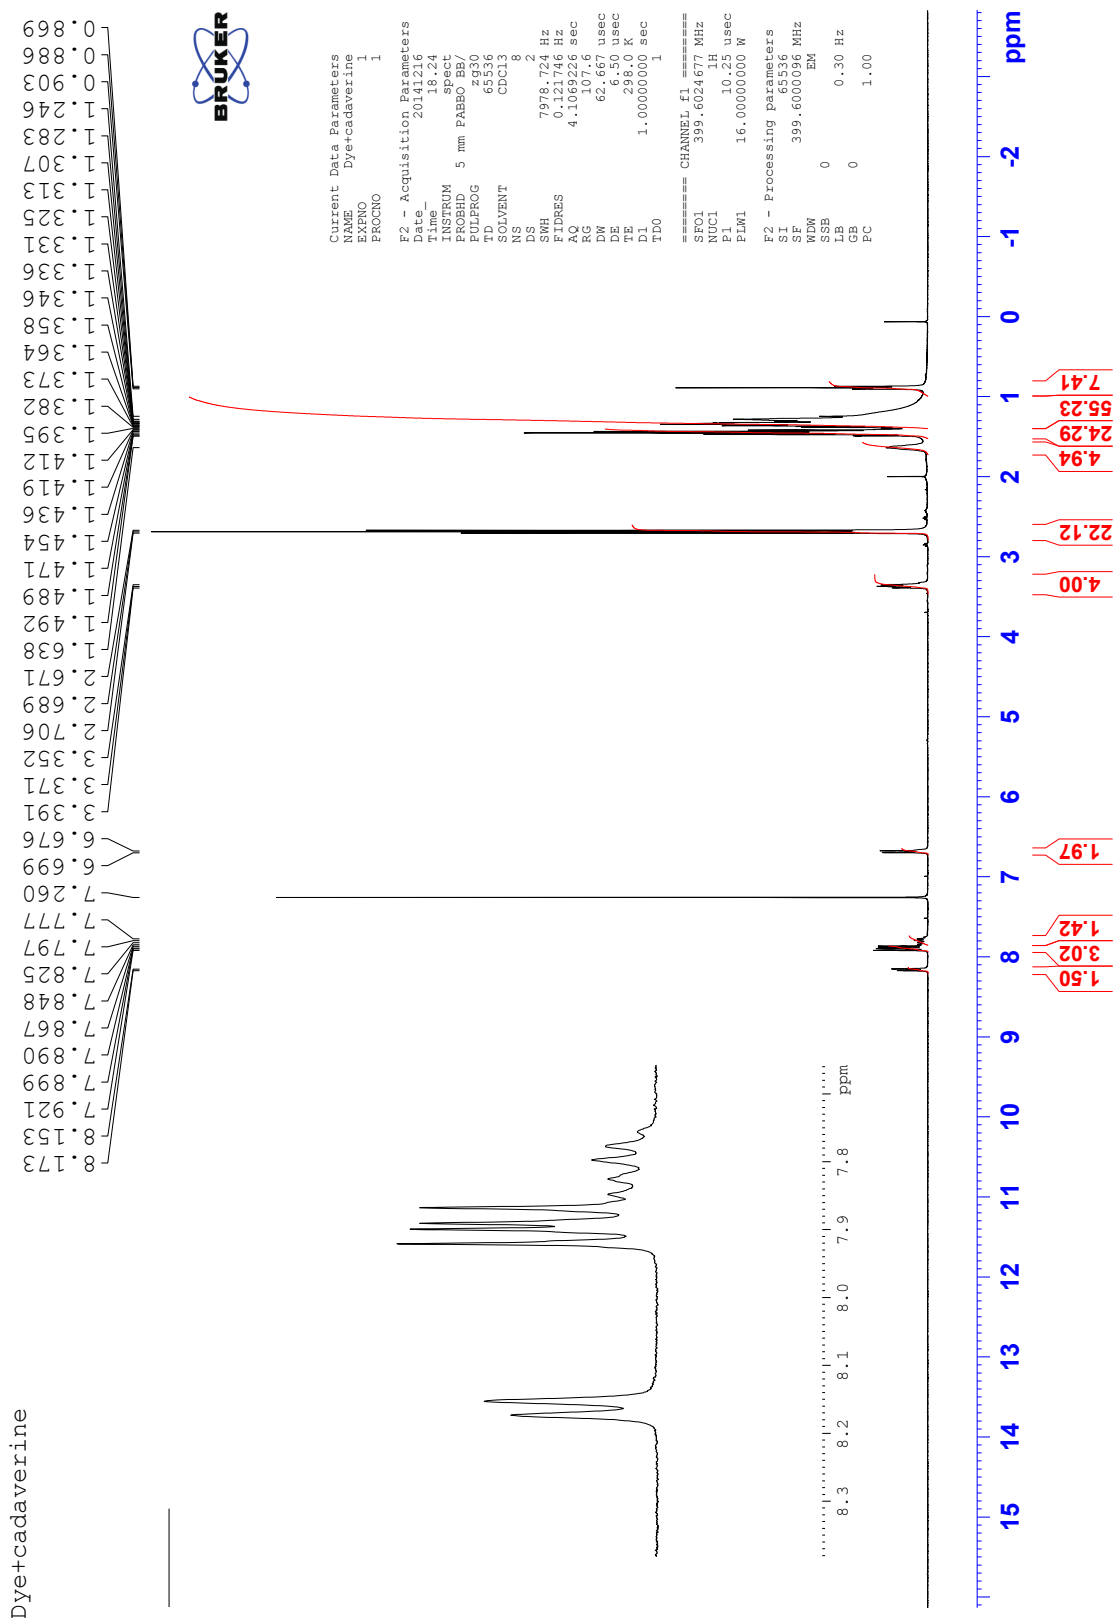

1.7 <sup>1</sup>H NMR Spectrum of Dye + cadaverine (1:1.5 eqv.) (spectrum taken after 20 min)

Dye+cadaverine 1.5

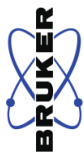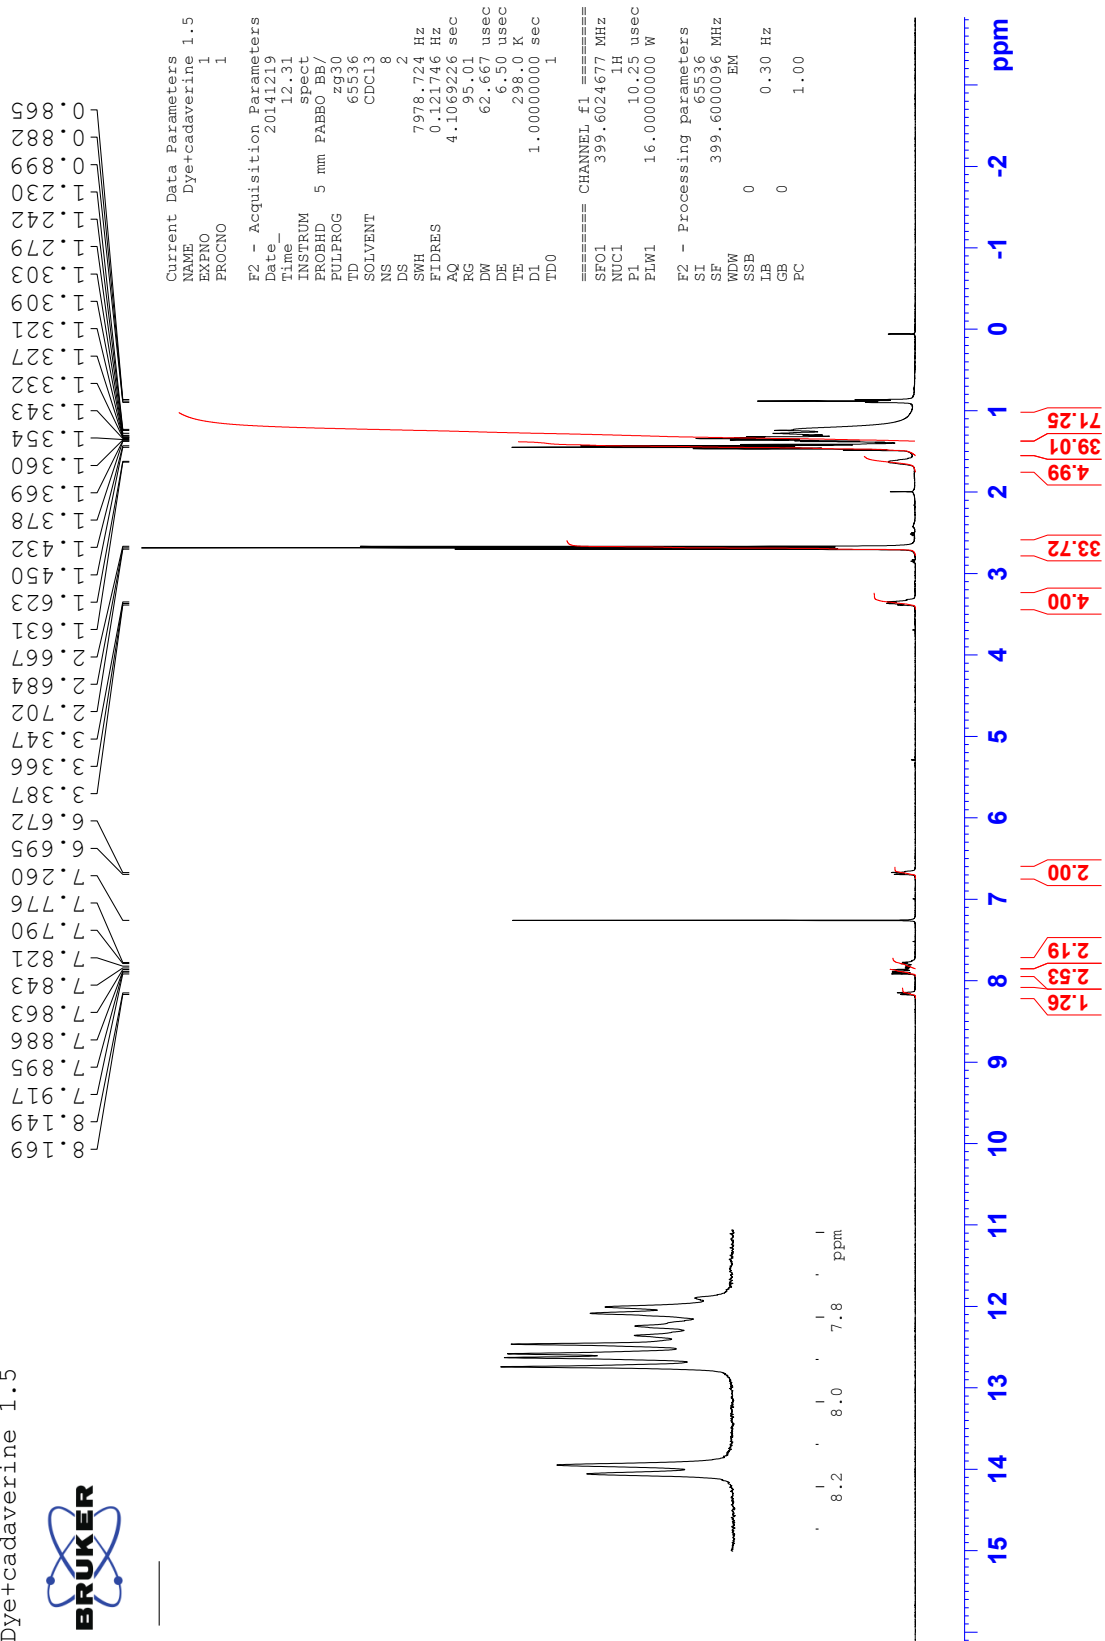

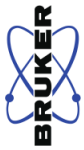

1.8 <sup>1</sup>H NMR Spectrum of Dye + cadaverine (1:2 eqv.) (spectrum taken after 20 min)

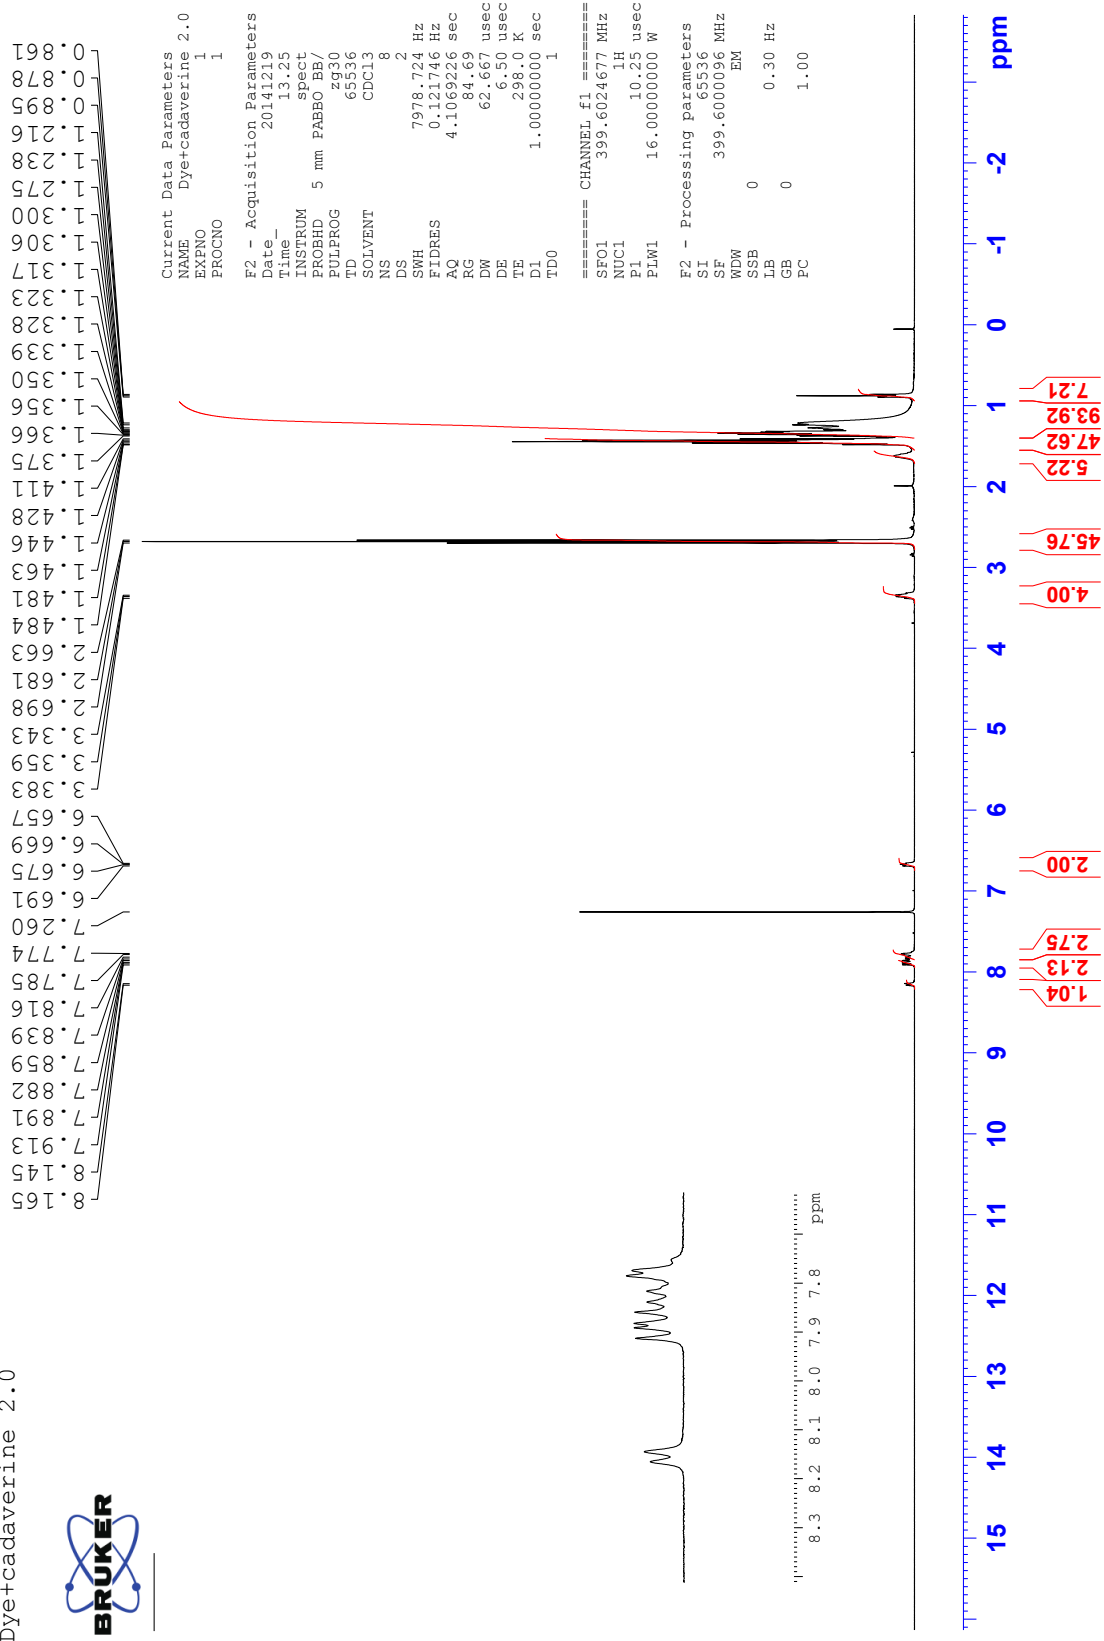

1.9 <sup>1</sup>H NMR Spectrum of Dye + cadaverine (1:3 eqv.) (spectrum taken after 20 min)

Dye+cadaverine 3.0

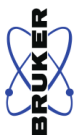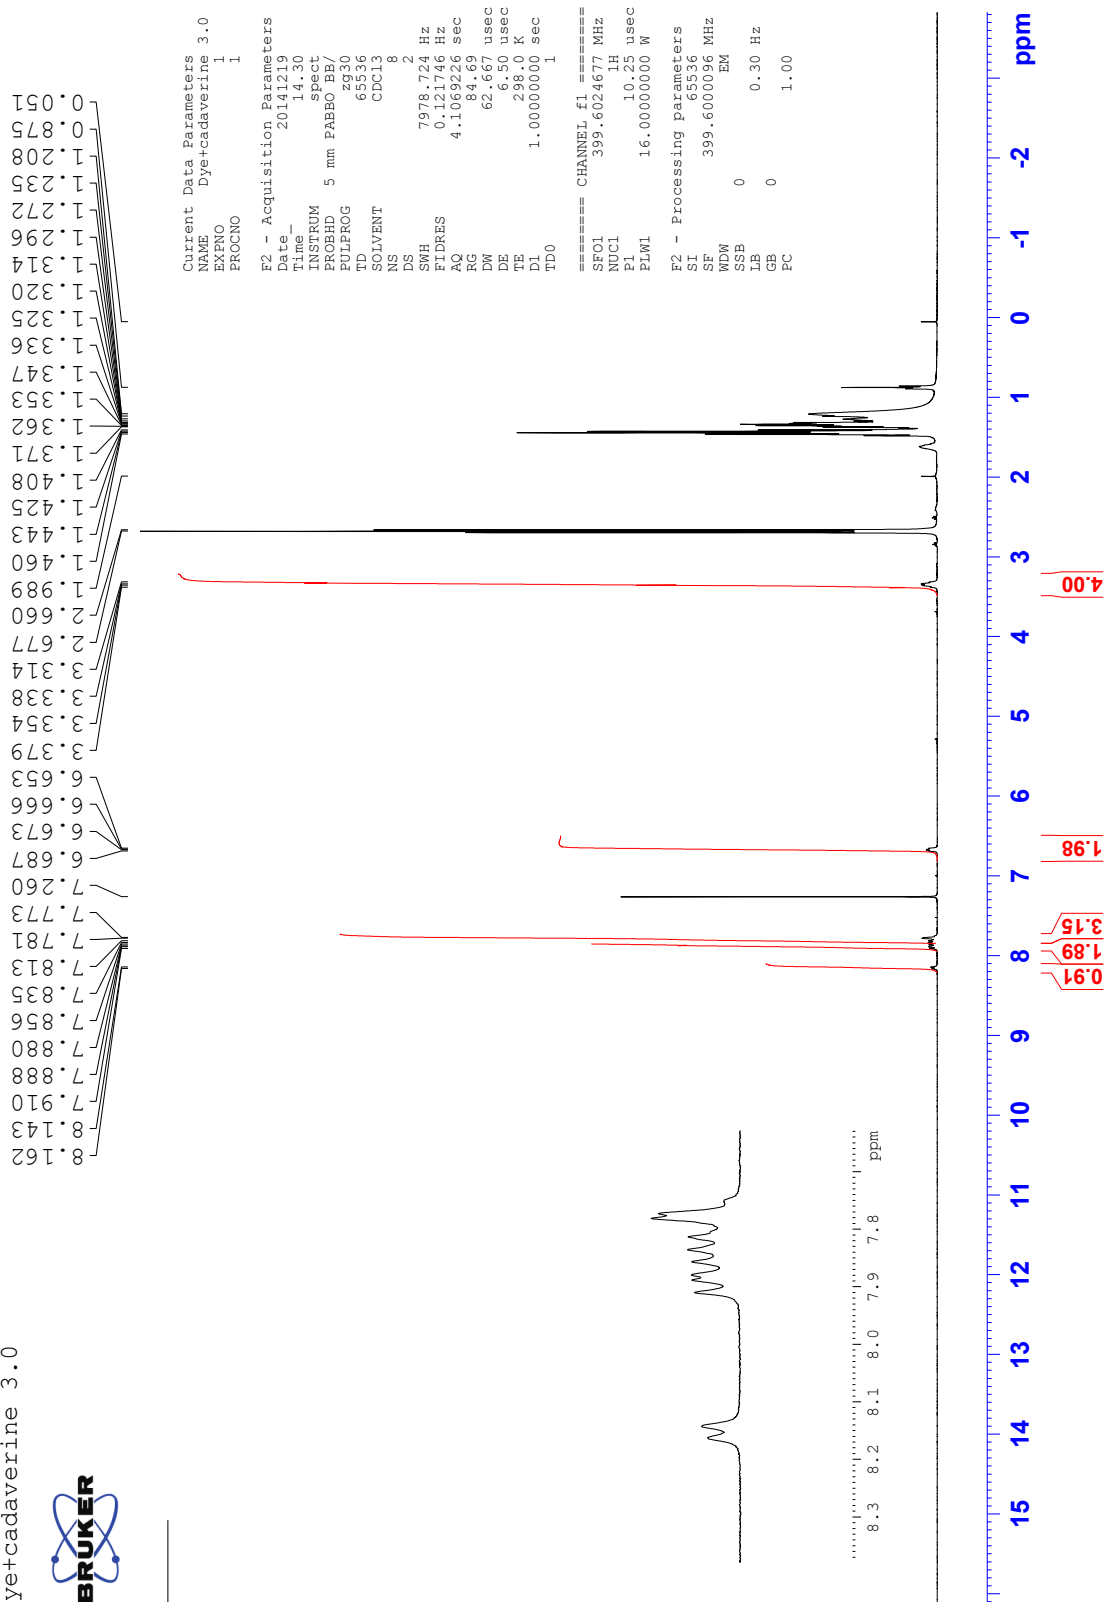

1.10 <sup>1</sup>H NMR Spectrum of Dye + cadaverine (1:4 eqv.) (spectrum taken after 20 min)

Dye+cadaverine 4.0

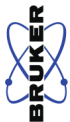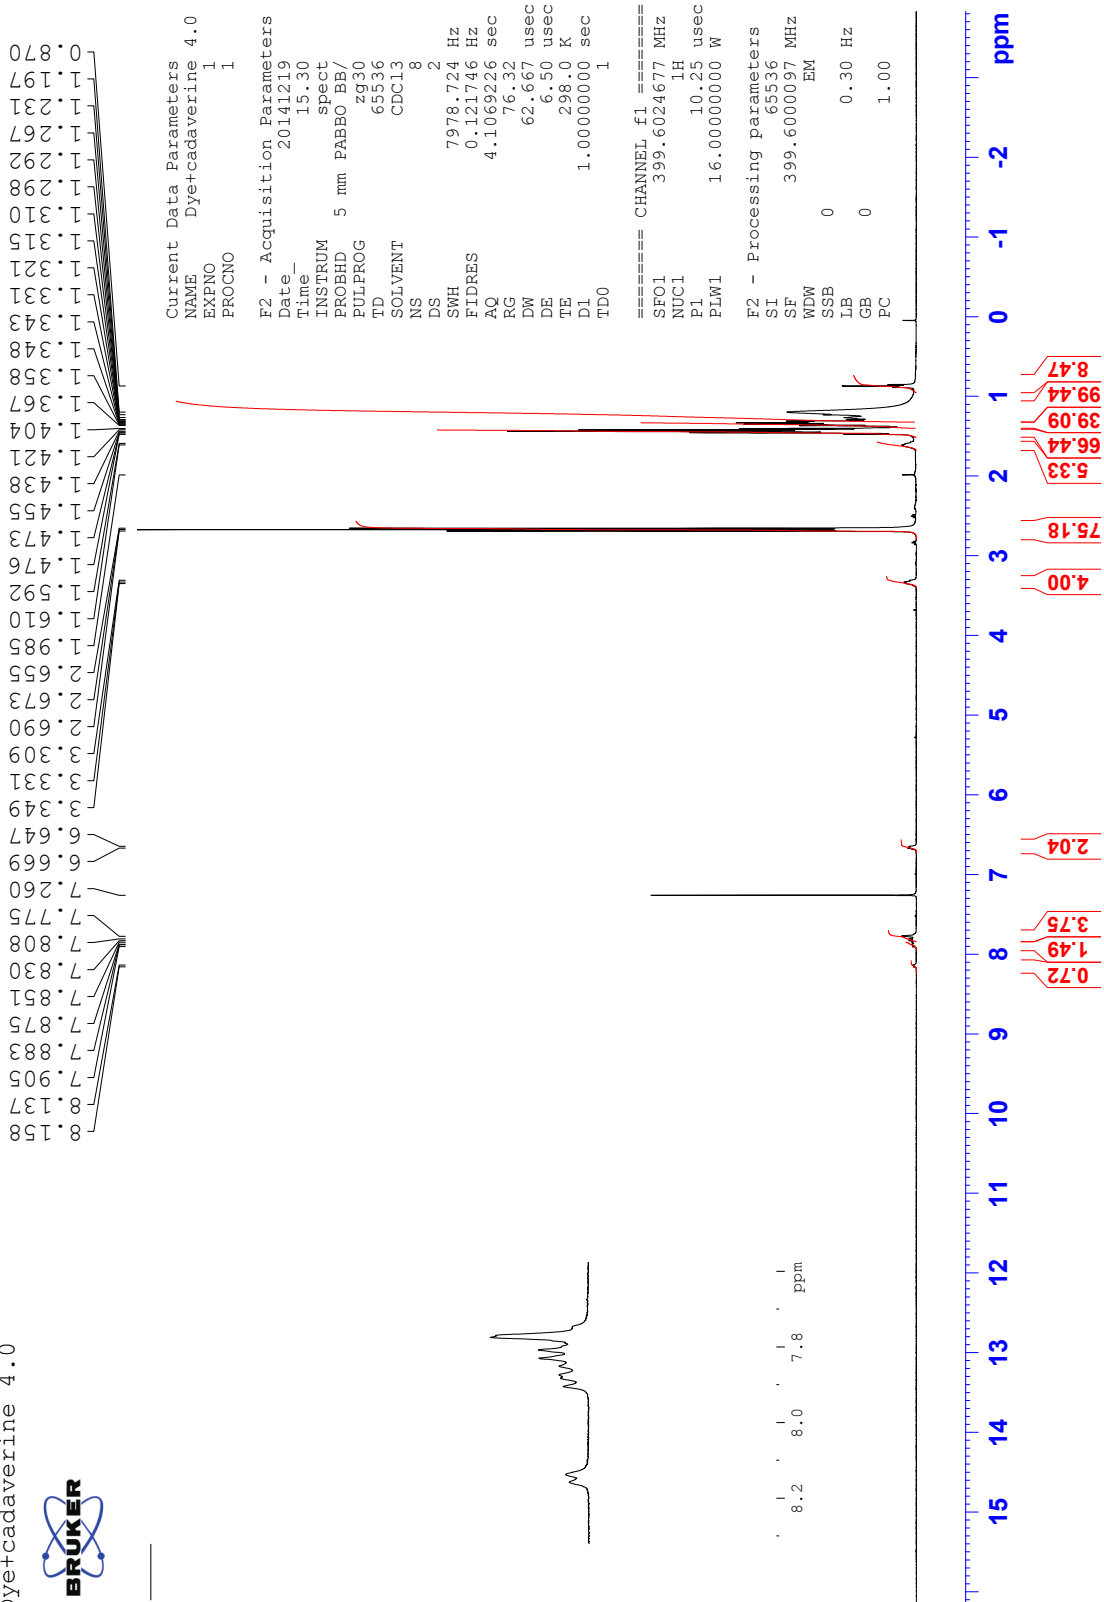

### 1.11 Comparison of spectra (dye and dye-cadaverine adduct at different concentrations):

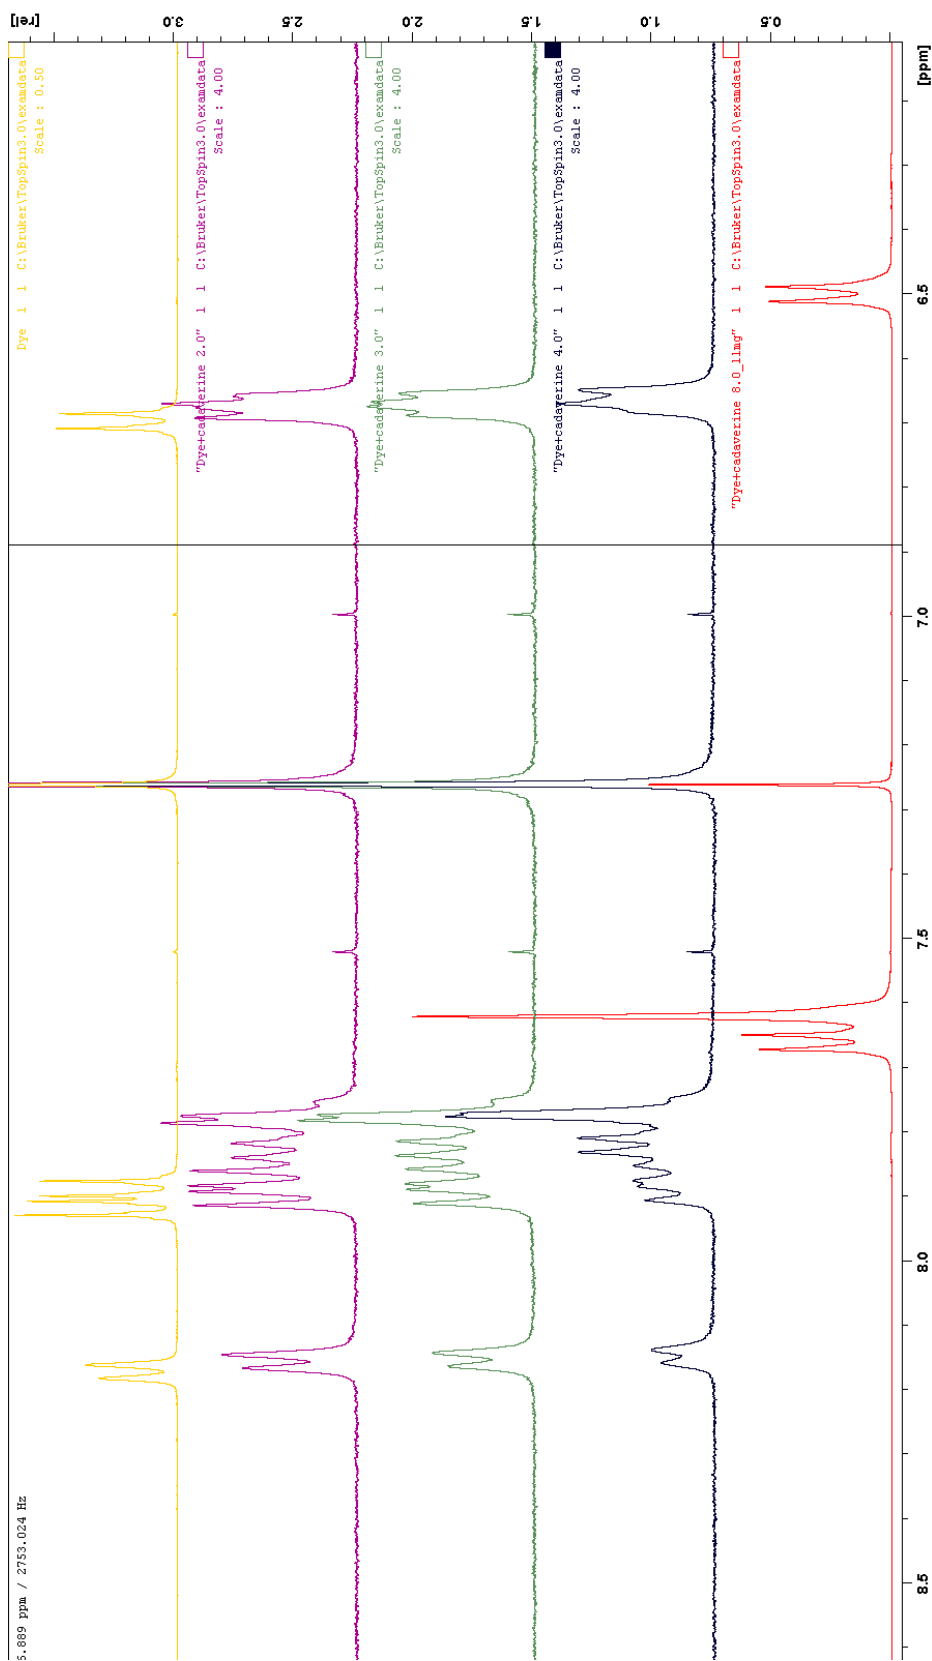



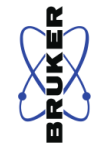

1.13 <sup>1</sup>H NMR Spectrum of Dye + Putrescine (1:1 eqv.) (spectrum taken after 20 min)

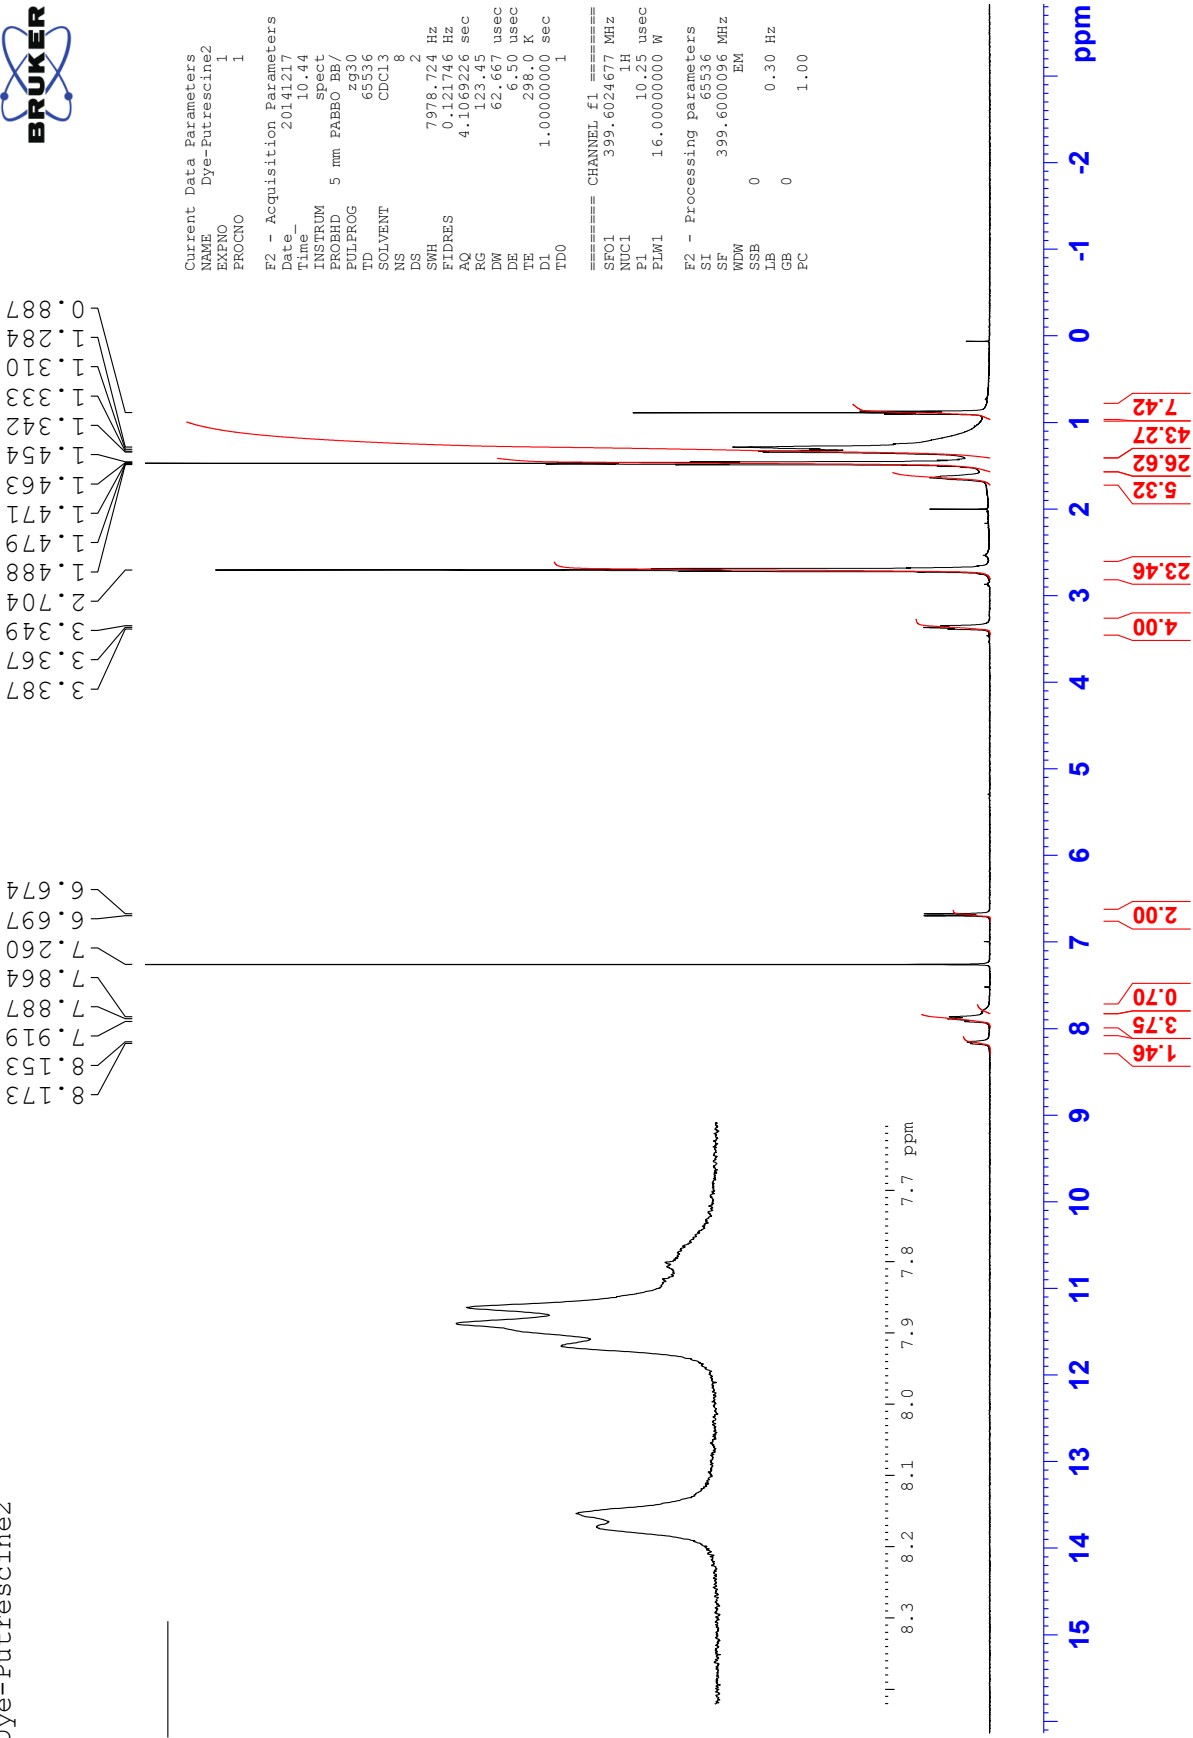

Current Data Parameters  
 NAME Dye-Putrescine2  
 EXPNO 1  
 PROCNO 1  
 F2 - Acquisition Parameters  
 Date\_ 20141217  
 Time\_ 10.44  
 INSTRUM spect  
 PROBHD 5 mm PABBO BB/  
 PULPROG zg30  
 TD 65536  
 SOLVENT CDCl3  
 NS 8  
 DS 2  
 SWH 7978.724 Hz  
 FIDRES 0.121746 Hz  
 AQ 4.1069226 sec  
 RG 123.45  
 DW 62.667 usec  
 DE 6.50 usec  
 TE 298.0 K  
 D1 1.00000000 sec  
 TDO 1  
 ===== CHANNEL f1 =====  
 SFO1 399.6024677 MHz  
 NUC1 1H  
 P1 10.25 usec  
 PLW1 16.00000000 W  
 F2 - Processing parameters  
 SI 65536  
 SF 399.6000096 MHz  
 WDW EM  
 SSB 0  
 LB 0  
 GB 0  
 PC 1.00



1.14 <sup>1</sup>H NMR Spectrum of Dye + Putrescine (1:2 eqv.) (spectrum taken after 20 min)

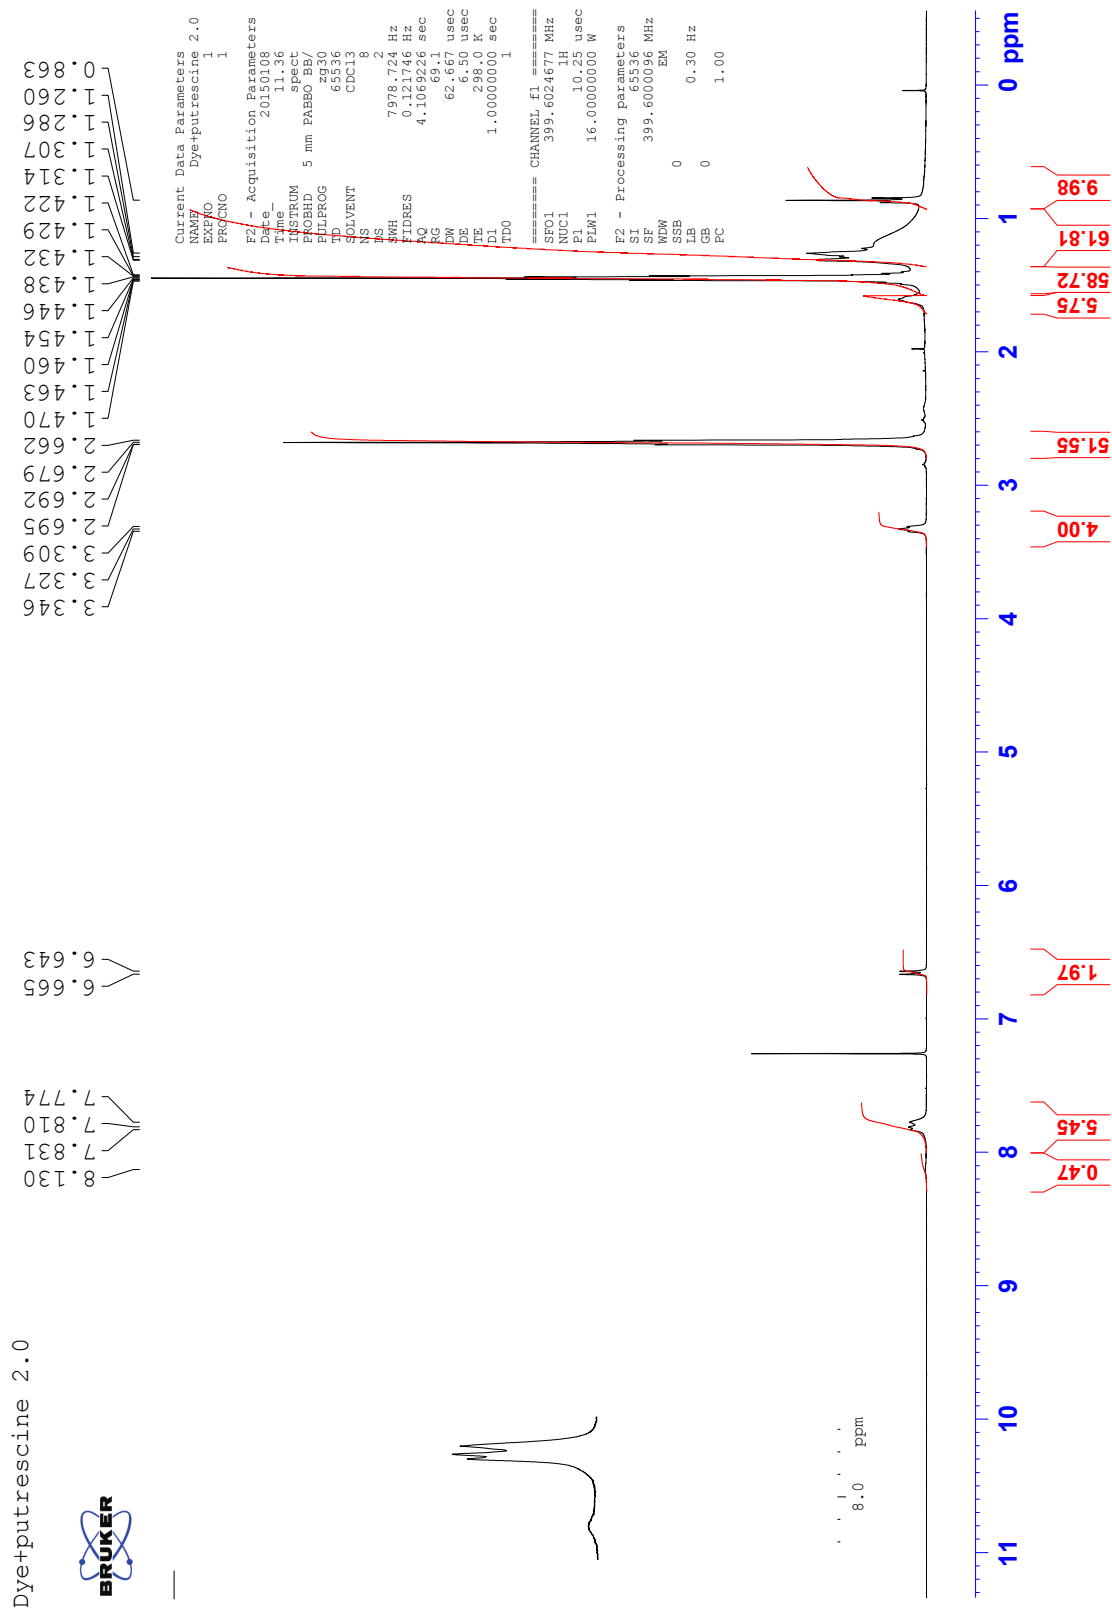

1.15 <sup>1</sup>H NMR Spectrum of Dye + Putrescine (1:2.5 eqv.) (spectrum taken after 20 min)

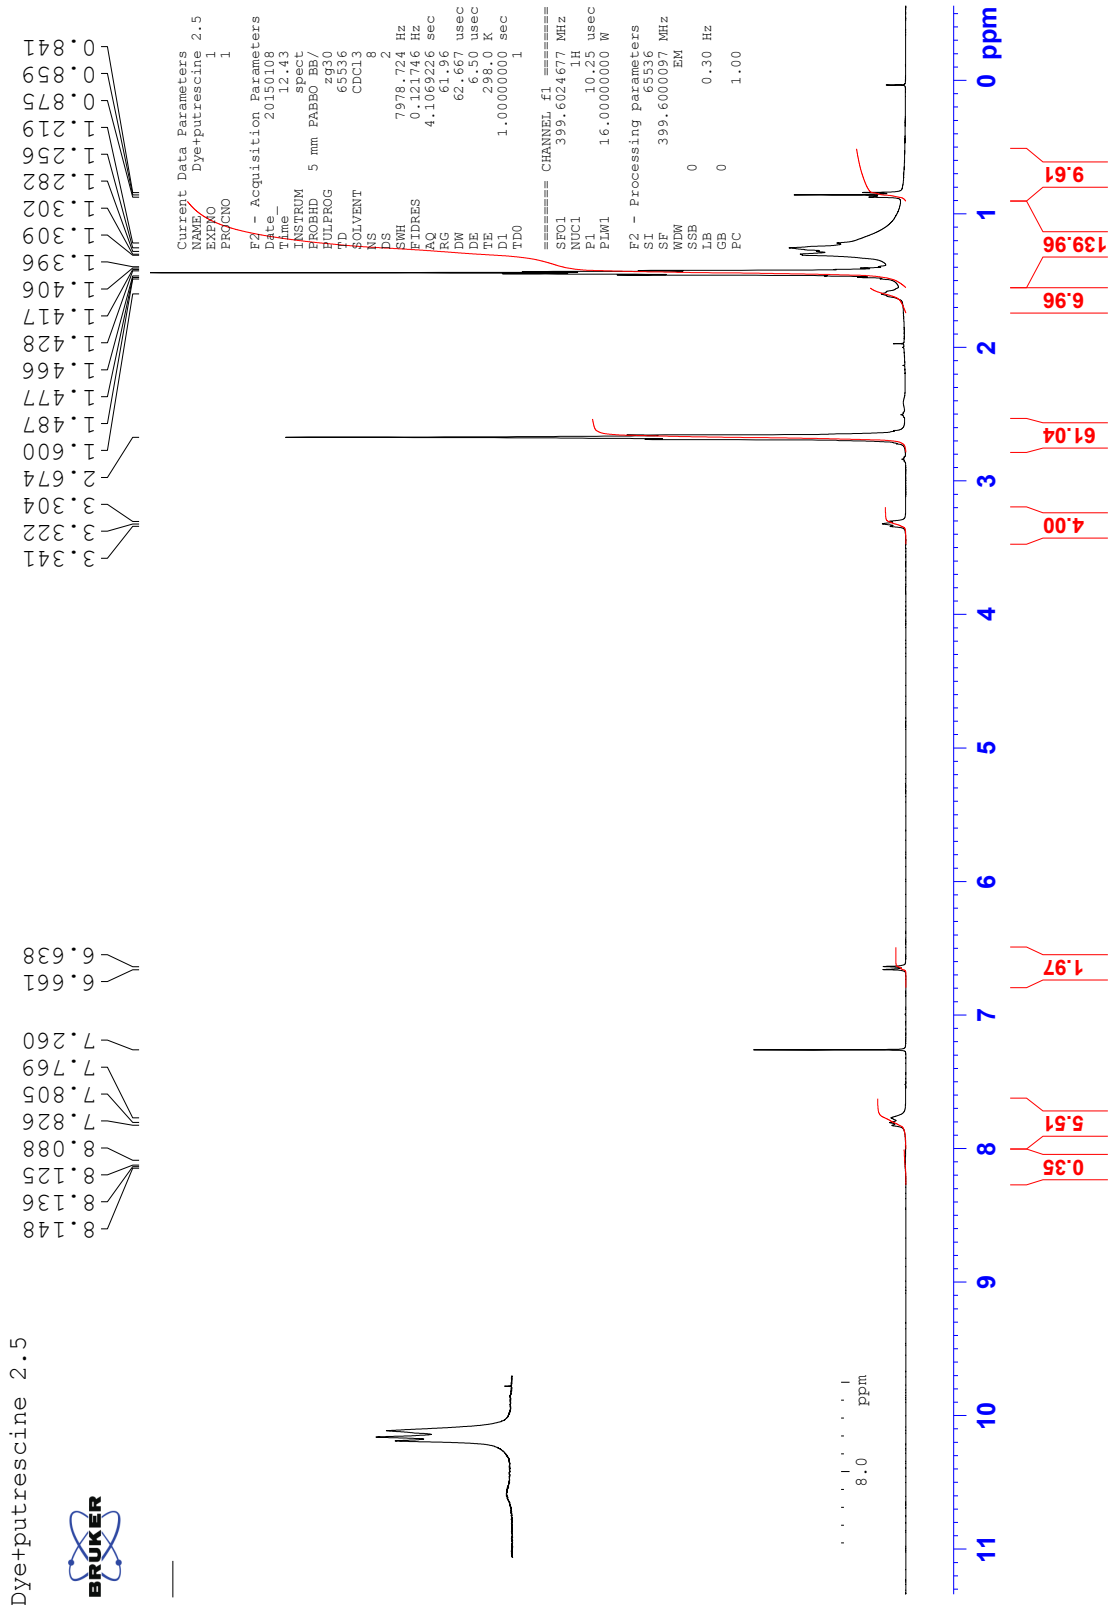

1.16 <sup>1</sup>H NMR Spectrum of Dye + Putrescine (1:3 eqv.) (spectrum taken after 20 min)

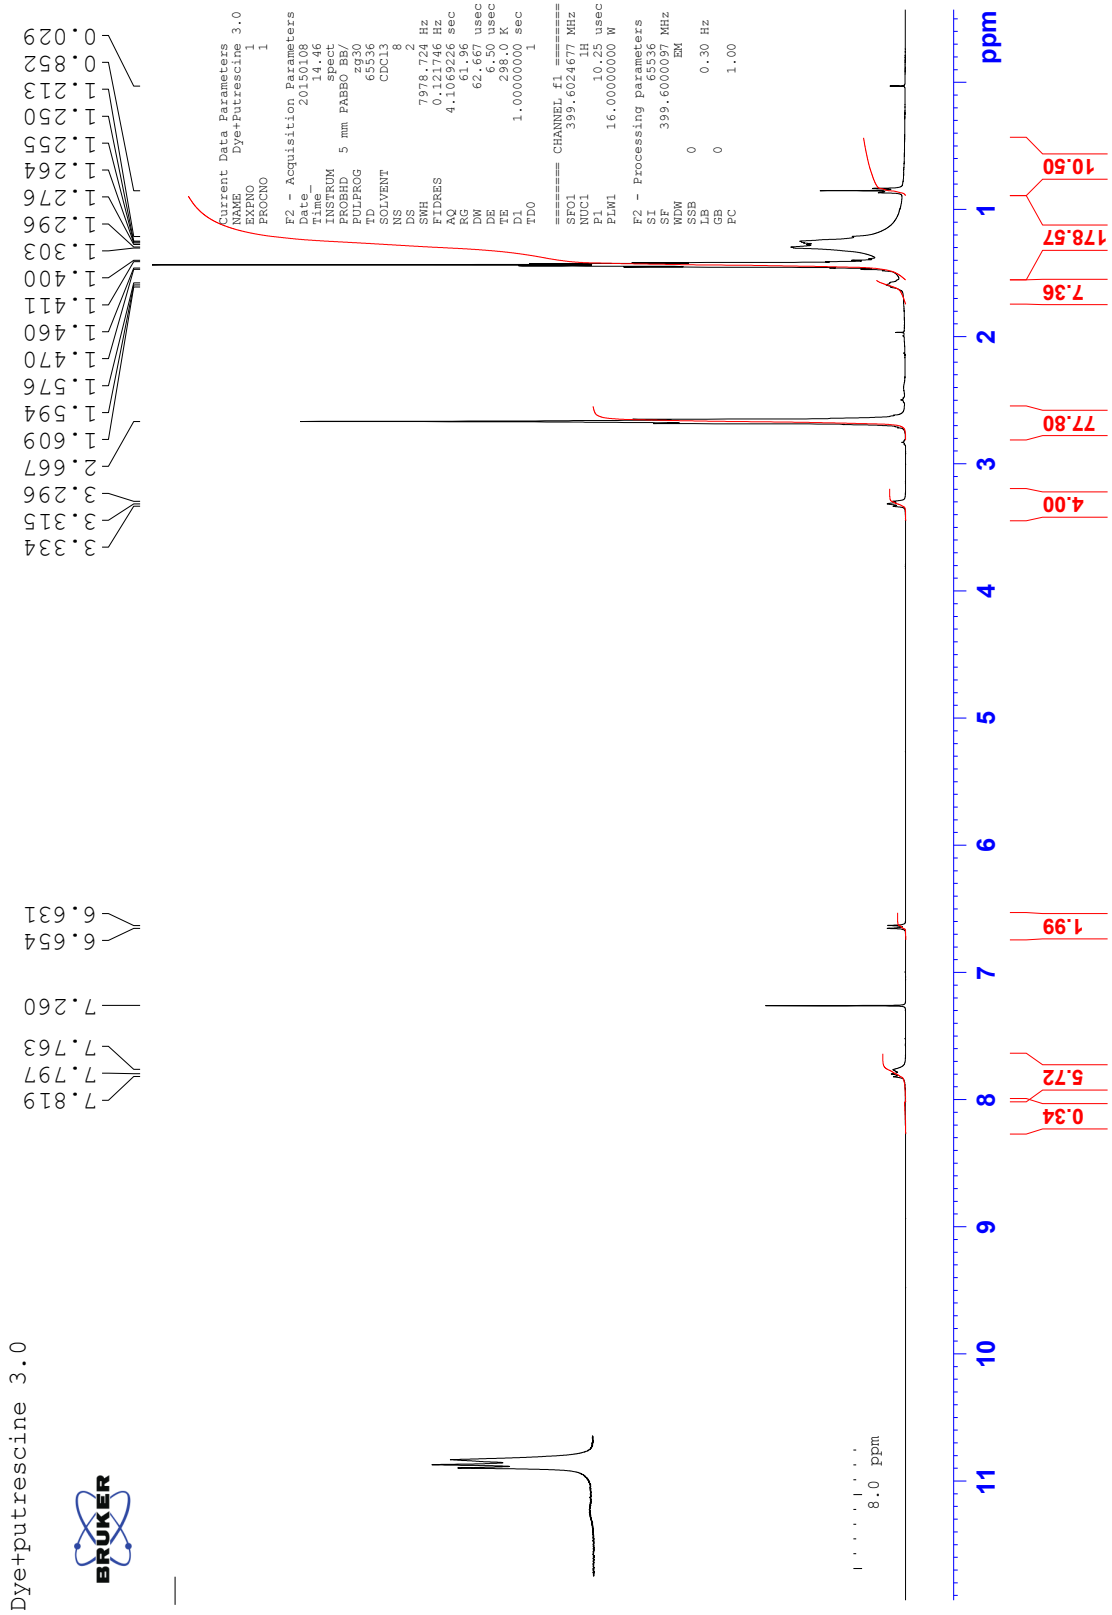

1.17 <sup>1</sup>H NMR Spectrum of Dye + Putrescine (1:8 eqv.) (spectrum taken after 20 min)

Dye+putrescine 8.0

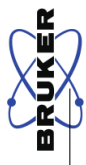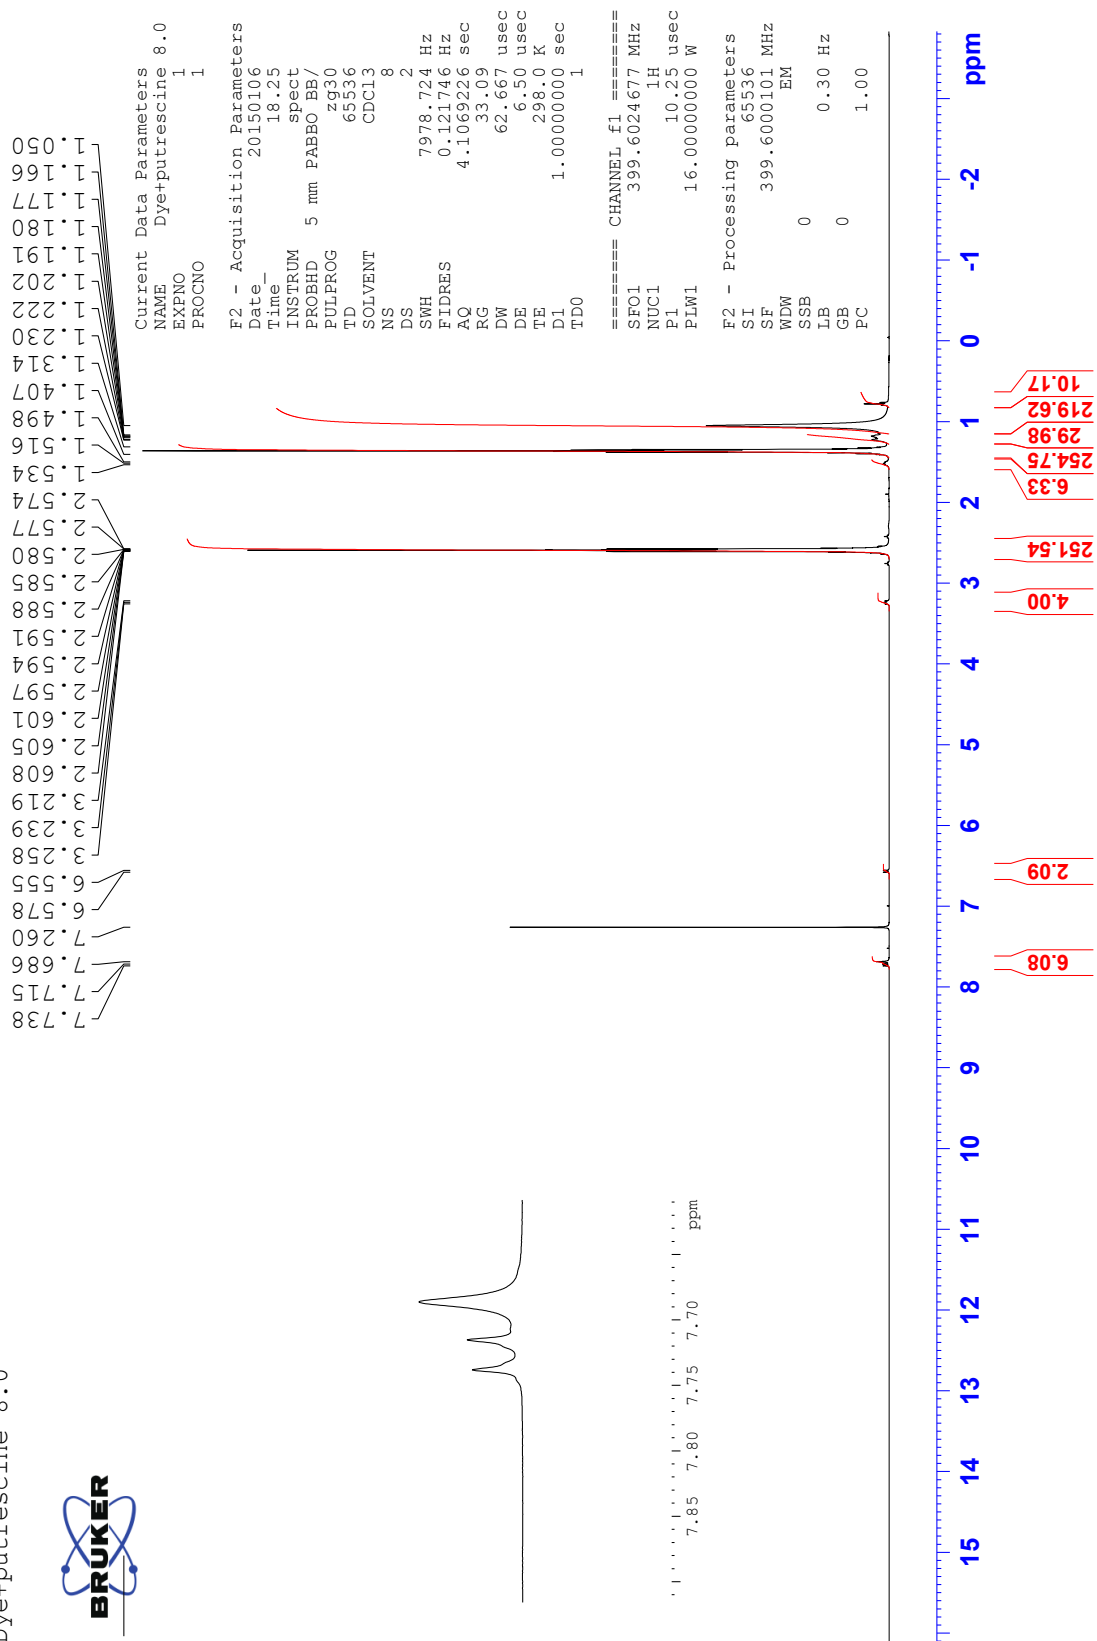

1.18 <sup>1</sup>H NMR Spectrum of Dye + Ethylamine (1:0.5 eqv.) (spectrum taken after 20 min).

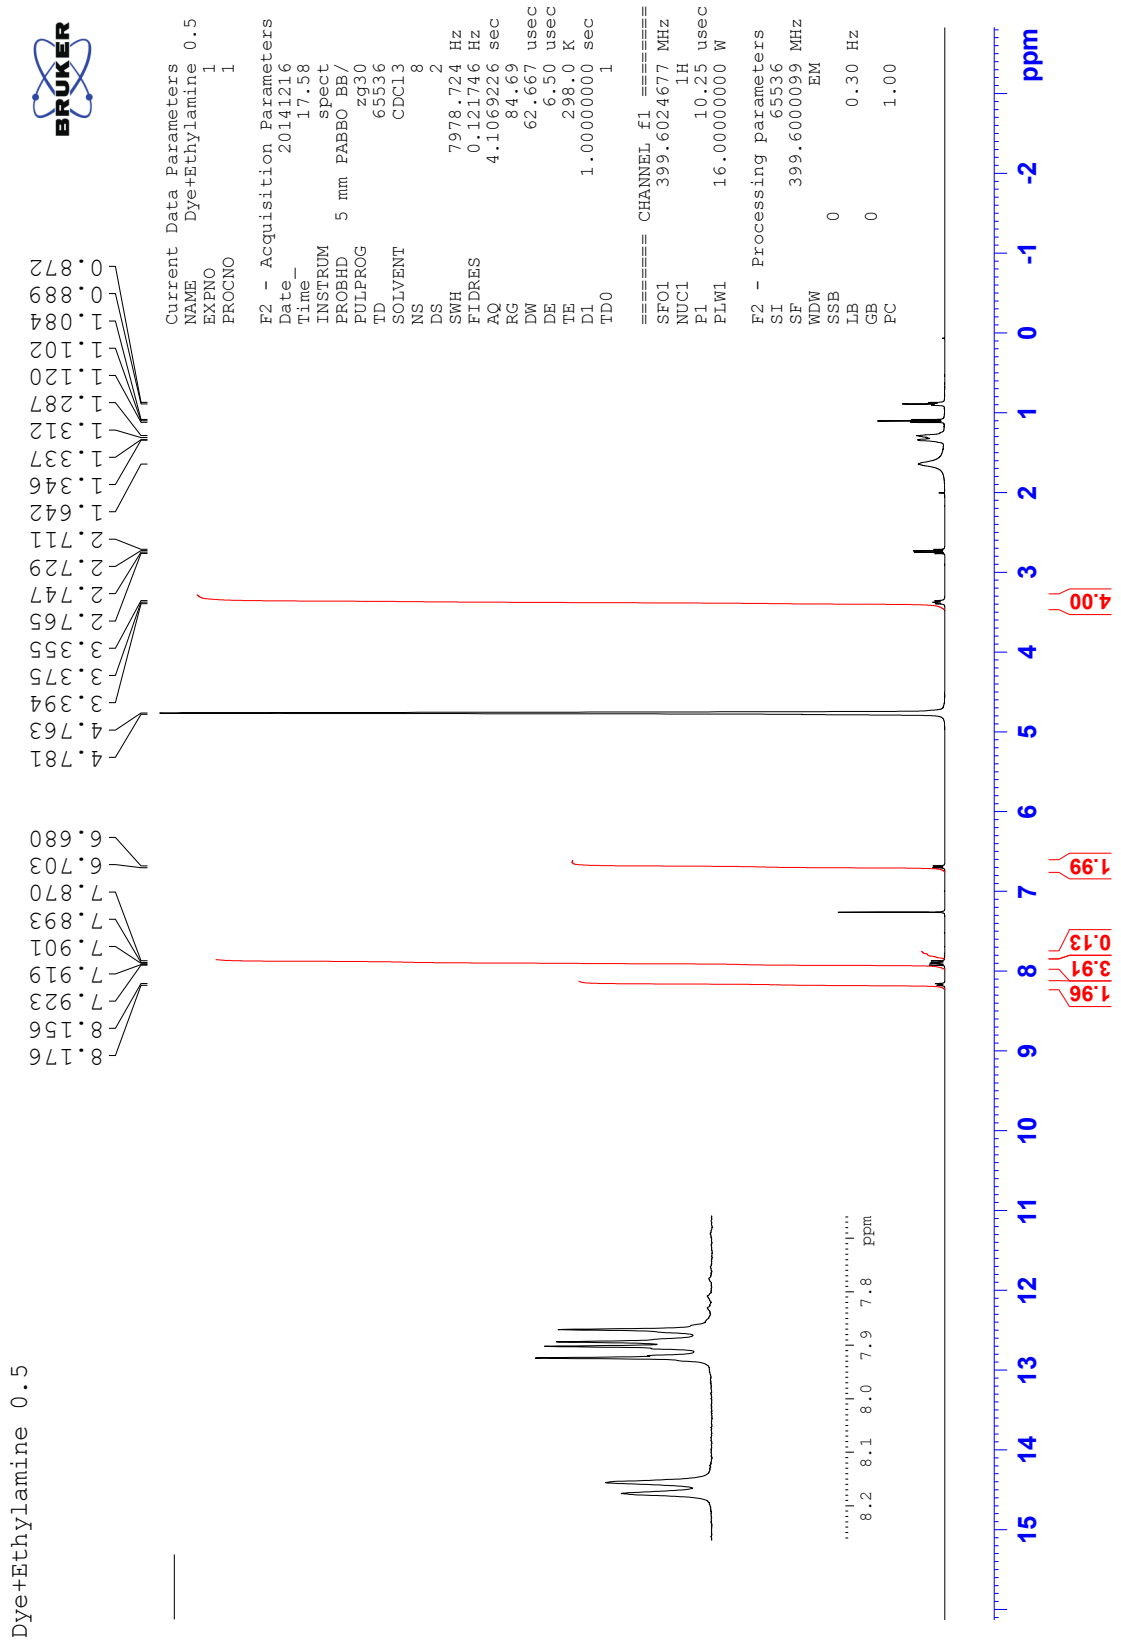

Dye+Ethylamine2

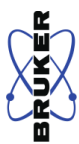

0.889  
1.084  
1.102  
1.120  
1.287  
1.312  
1.337  
1.346  
1.643  
2.711  
2.729  
2.747  
2.765  
3.355  
3.375  
3.394  
4.772  
7.176  
8.156  
7.923  
7.901  
7.893  
7.870  
7.260

Current Data Parameters  
NAME Dye+Ethylamine2  
EXNO 1  
PROCNO 1  
F2 - Acquisition Parameters  
Date\_ 20141217  
Time 10.49  
INSTRUM spect  
PROBHD 5 mm PABBO BE/  
PULPROG zg30  
TD 65536  
SOLVENT CDCl3  
NS 8  
DS 2  
SWH 7978.724 Hz  
FIDRES 0.112174 Hz  
AQ 4.106225 sec  
RG 662  
DM 62.667 usec  
DE 6.50 usec  
TE 298.0 K  
D1 1.00000000 sec  
TD0 1  
=====  
CHANNEL f1  
SFO1 399.6024677 MHz  
NUC1 1H  
P1 10.25 usec  
PLW1 16.00000000 W  
F2 - Processing parameters  
SI 65536  
SF 399.6000096 MHz  
WDW EM  
SSB 0  
LB 0.30 Hz  
GB 0  
PC 1.00

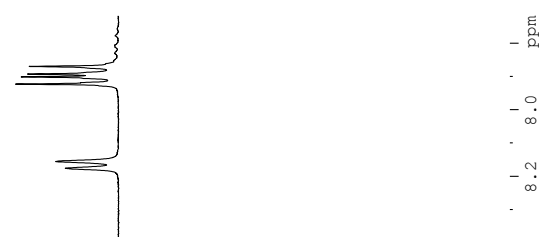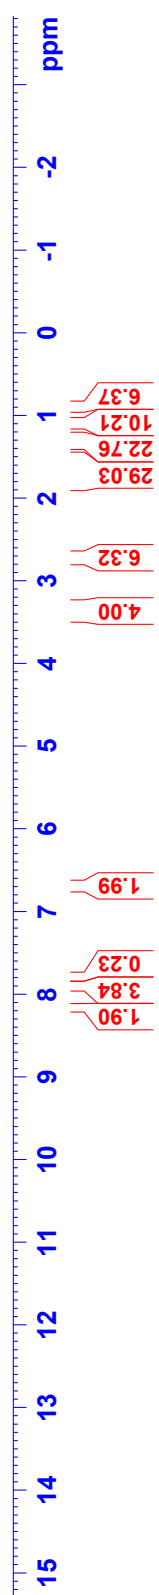

1.20 <sup>1</sup>H NMR Spectrum of Dye + Ethylamine (1:2 eqv.) (spectrum taken after 20 min)

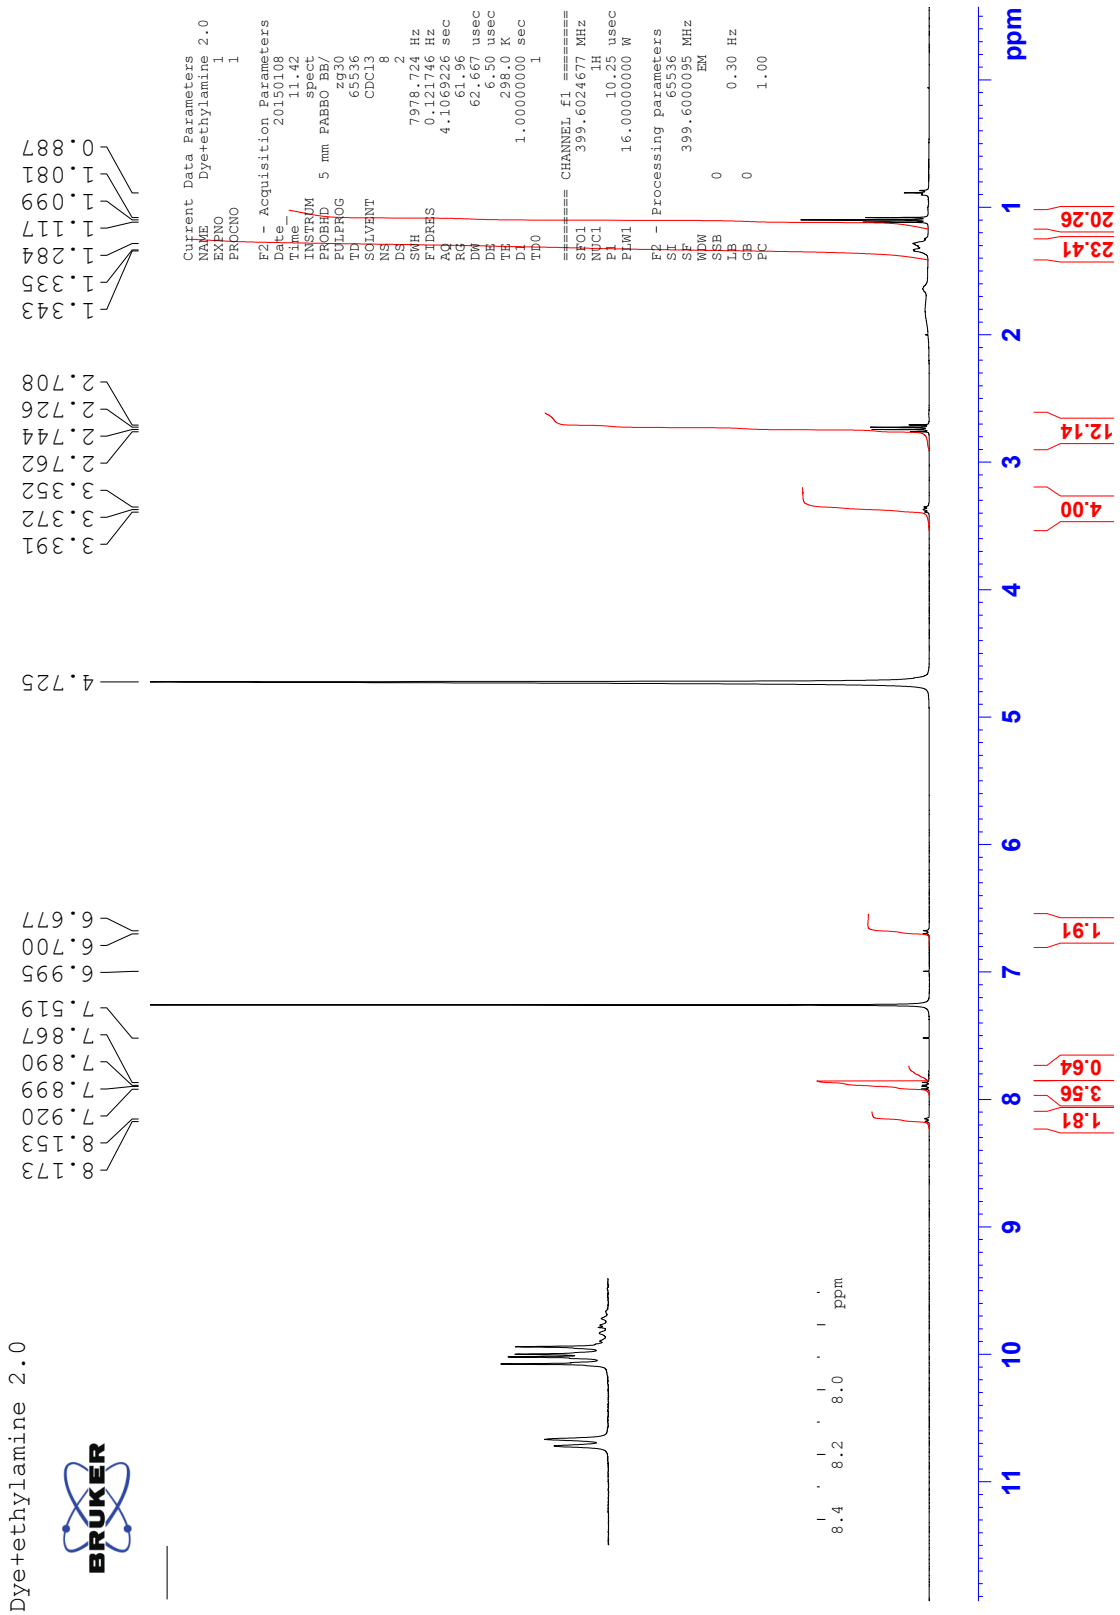

1.21 <sup>1</sup>H NMR Spectrum of Dye + Ethylamine (1:3 eqv.) (spectrum taken after 20 min)

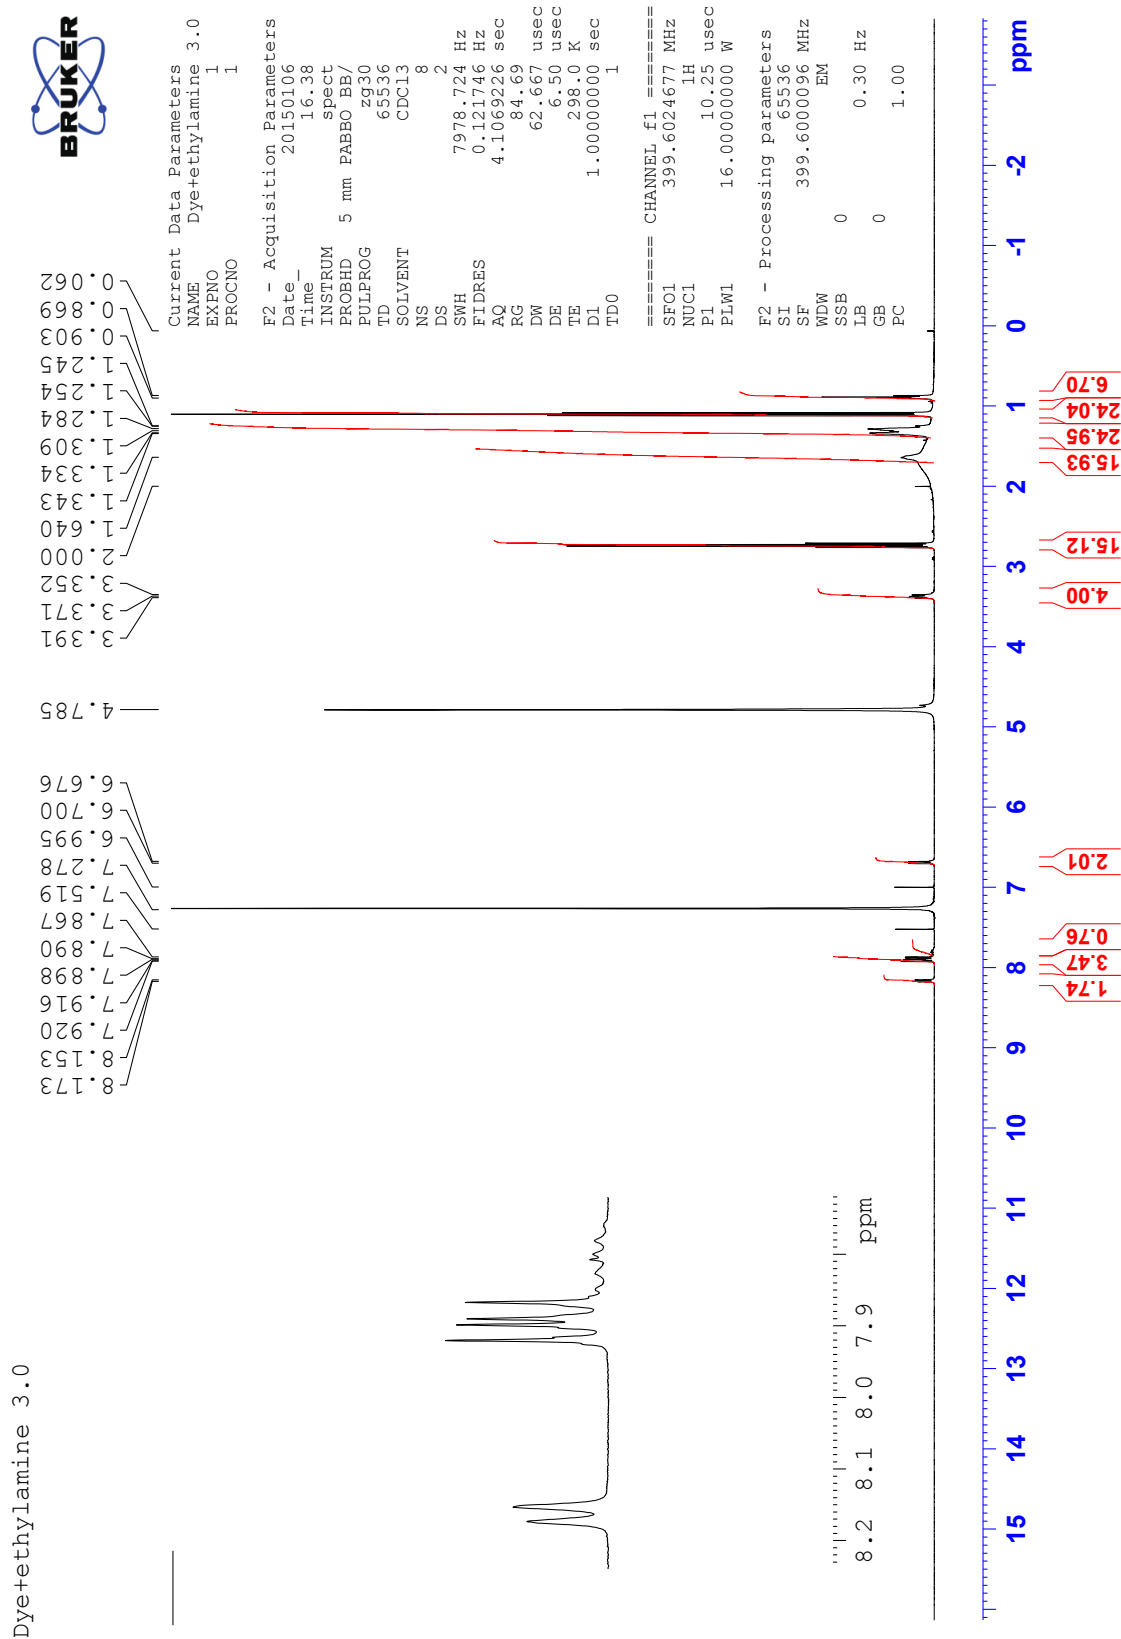



1.22 <sup>1</sup>H NMR Spectrum of Dye + Ethylamine (1:4eqv.) (spectrum taken after 20 min)

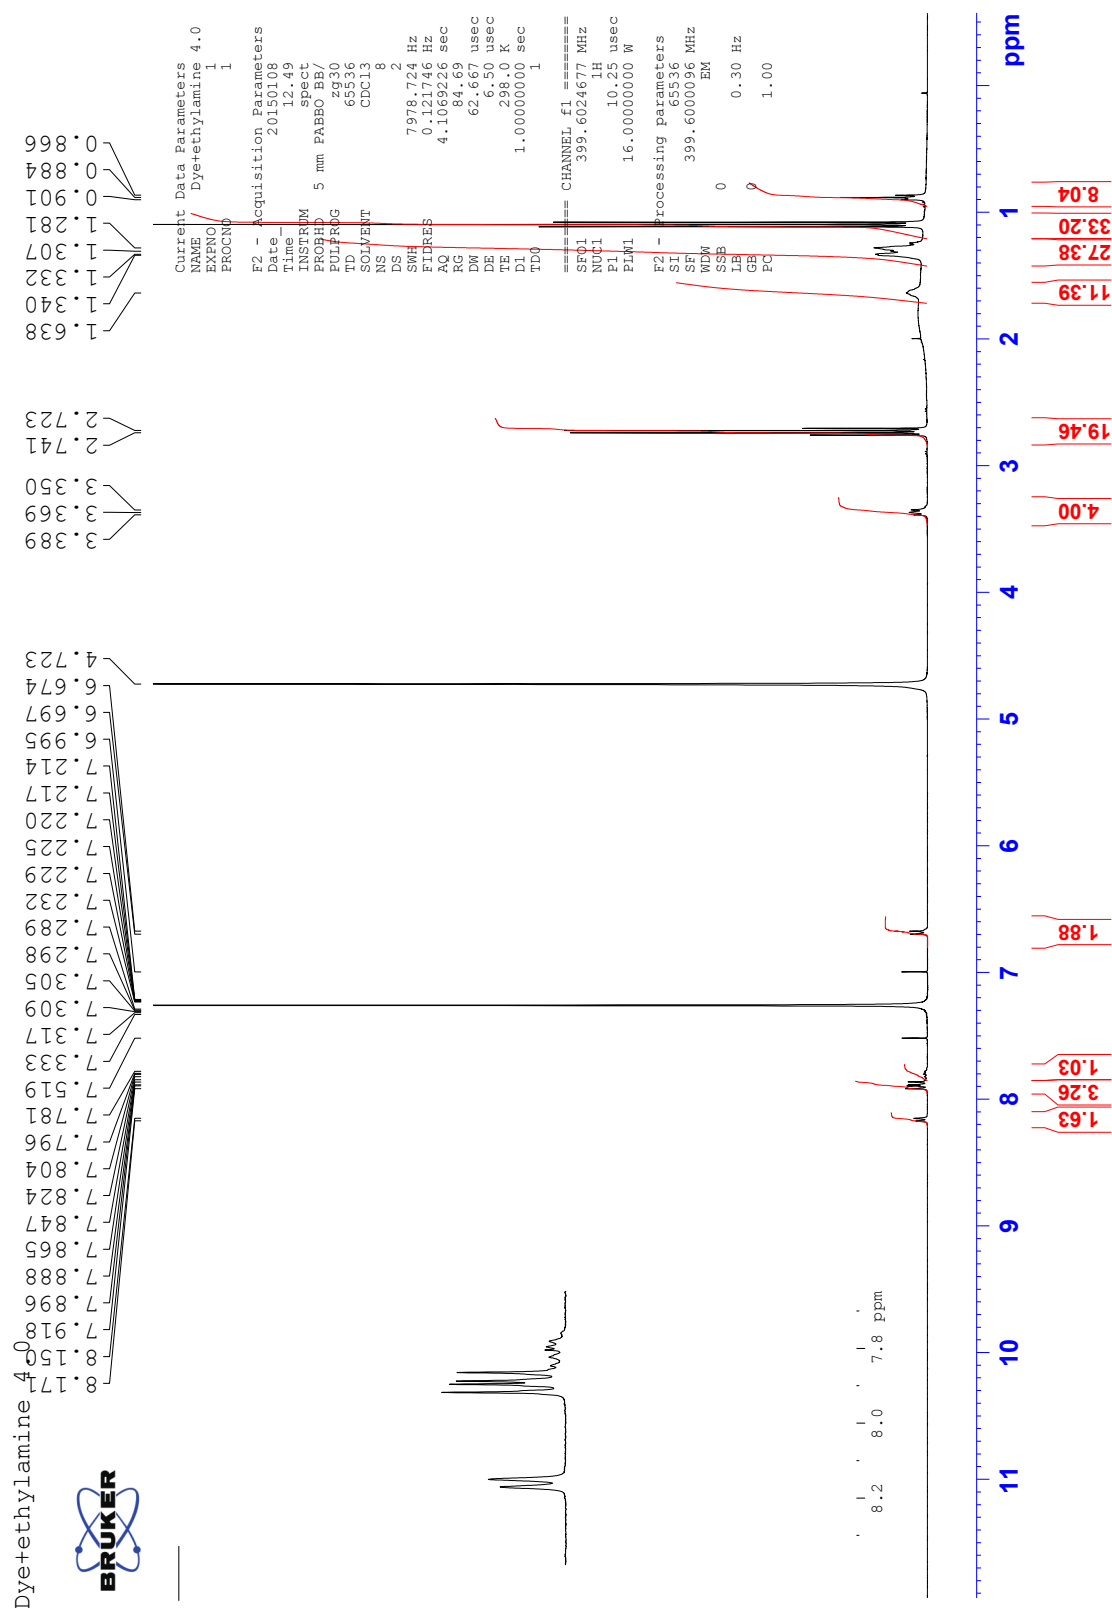

1.23 <sup>1</sup>H NMR Spectrum of Dye + Ethylamine (1:8 eqv.) (spectrum taken after 20 min)

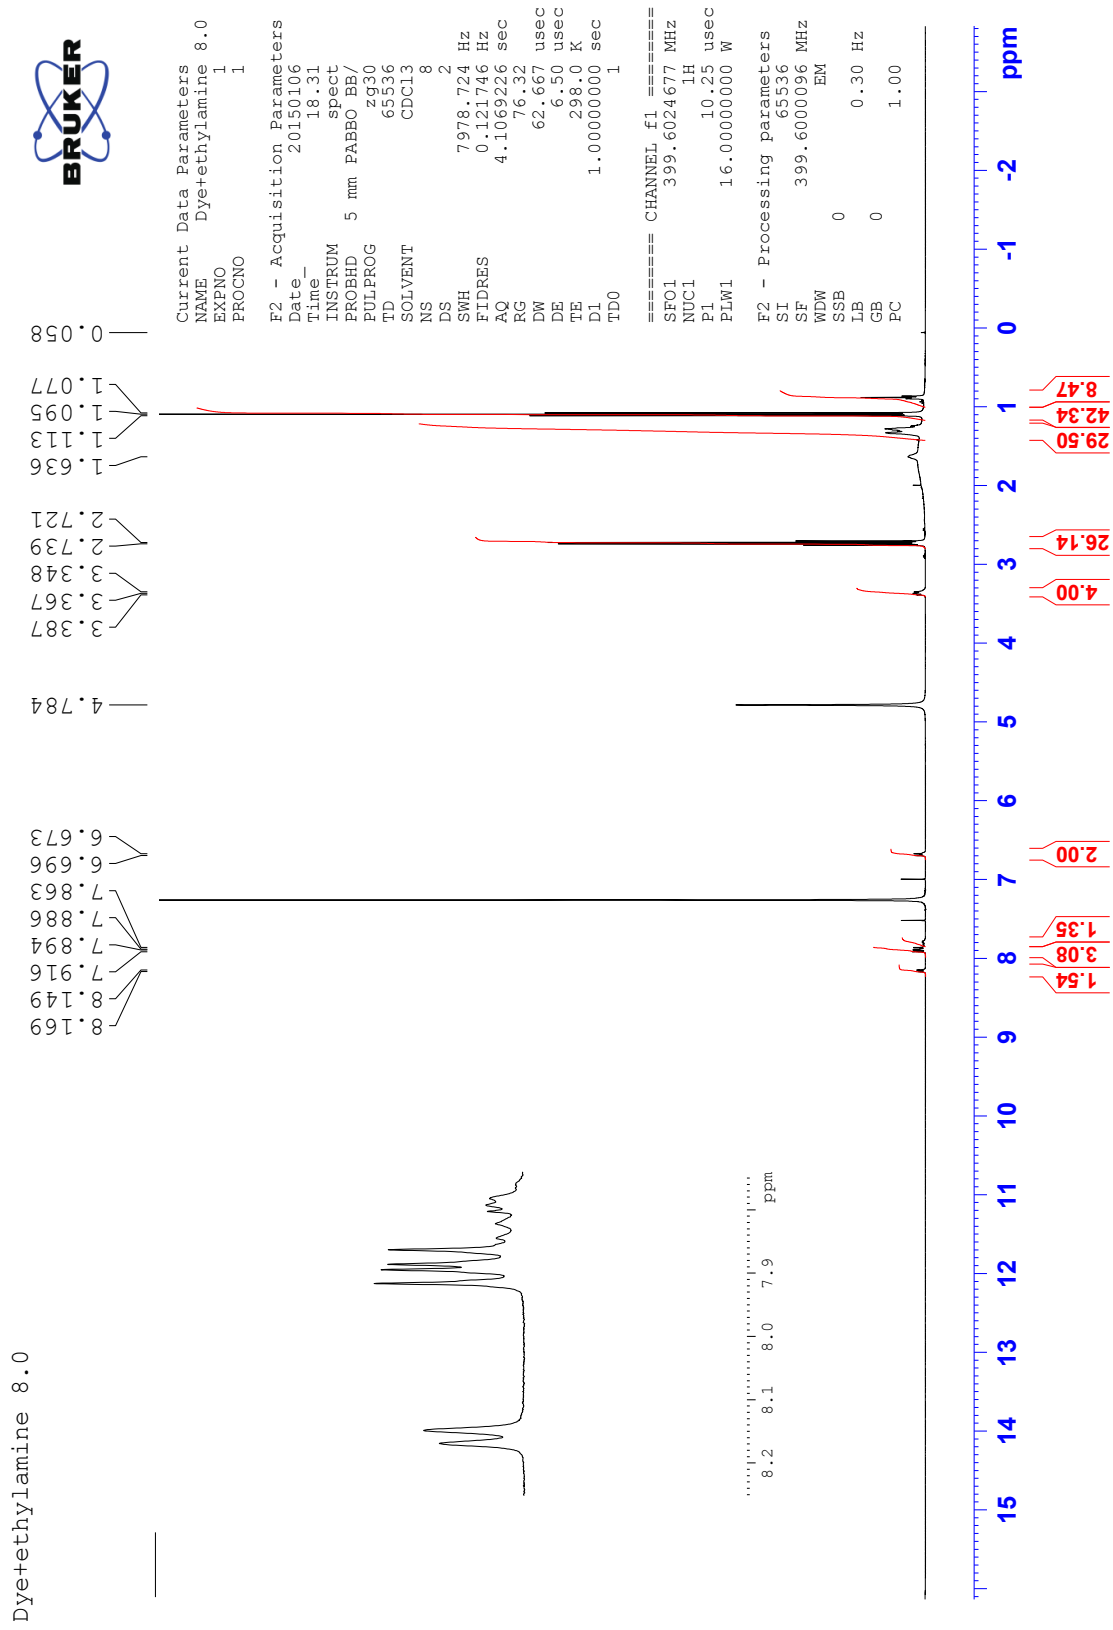

1.24 <sup>1</sup>H NMR Spectrum of Dye + ammonia (1:1 eqv.) (spectrum taken after 20 min).

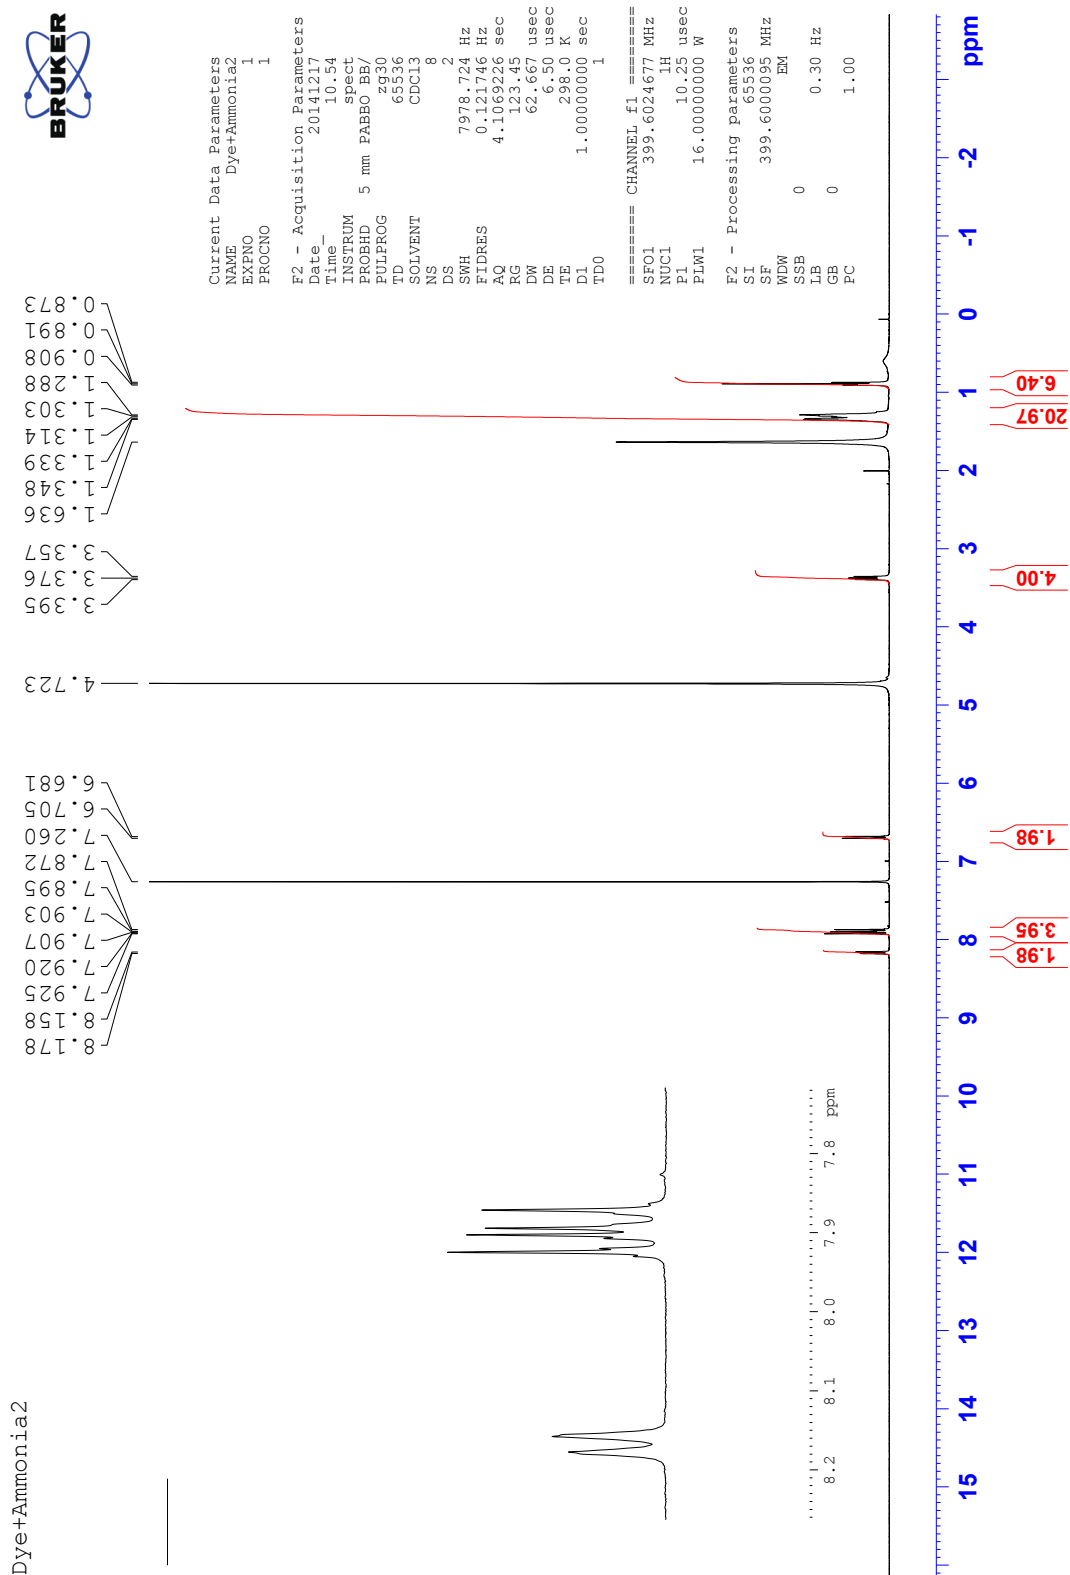

## 1.25 Comparison of spectra

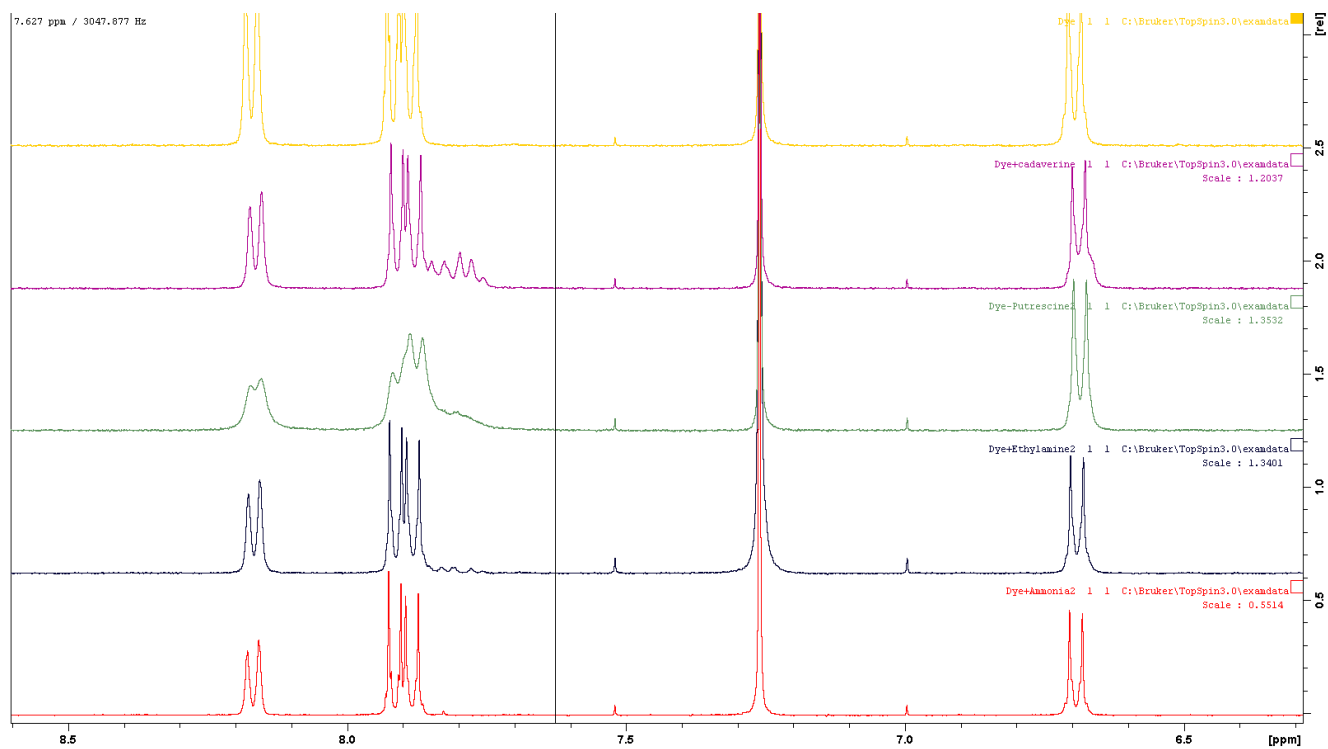

## References:

1. Eric Mertz, James B. Beil, and Steven C. Zimmerman *Org. Lett.*, 2003, 5, 3127-3130
2. Malwina Allen And John D. Roberts *Can. J. Chem.*, 1981, 59, 451-458

### Color transformation from RGB to Lab space

Before the image processing, four different color pattern (three reference colors patterns (red, green and blue) and the sensor pattern) are cropped separately. The size of each input color pattern is about 25×25 pixels. Color in RGB space (r, g, b) were converted to CIELAB colorspace (L, a, b) using Matlab functions.

```
cform = makecform('srgb2lab');  
lab_image = applycform(rgb_image, cform);
```

The average values for L\*, a\* and b\* were then calculated for every four squares.

```
average_L = lab2double(mean(mean(lab_image(:,:,1))));  
average_a = lab2double(mean(mean(lab_image(:,:,2))));  
average_b = lab2double(mean(mean(lab_image(:,:,3))));
```

In mathematical form, the color transformation is done by two steps: (1) from sRGB color space to CIEXYZ color space, (2) from CIEXYZ color space to CIELAB color space.

Before the color transformation, the color correction of input images must be taken to eliminate the photographic error from the display on monitor. As a result, the color in sRGB space should be modified to linear RGB space as below.<sup>[1]</sup>

Note: When images are presented on a monitor, the gamma value of color in sRGB space is 2.0 – 2.5 and it should be transformed to 1.0 (in linear RGB space).

$$C_{linear} = \begin{cases} \frac{C_{srgb}}{12.92}, & \text{if } C_{srgb} \leq 0.03928 \\ \left(\frac{C_{srgb} + 0.055}{1.055}\right)^{2.4}, & \text{if } C_{srgb} > 0.03928 \end{cases}$$

$C_{sRGB}$  is r, g and b value of each input color in sRGB space.

The color transformation from sRGB color space to CIEXYZ color space is followed by the linear equation:

$$\begin{bmatrix} X \\ Y \\ Z \end{bmatrix} = \begin{bmatrix} 0.4124 & 0.3576 & 0.1805 \\ 0.2126 & 0.7152 & 0.0722 \\ 0.0193 & 0.1192 & 0.9505 \end{bmatrix} \begin{bmatrix} R_{linear} \\ G_{linear} \\ B_{linear} \end{bmatrix}$$

Then, the coordinate of each color (X, Y, Z) in CIEXYZ space was subsequently transformed to (L, a, b) in Lab color space.<sup>[2]</sup>

$$L = 116 \times f\left(\frac{Y}{Y_n}\right) - 16$$
$$a = 500 \times \left[ f\left(\frac{X}{X_n}\right) - f\left(\frac{Y}{Y_n}\right) \right]$$
$$b = 200 \times \left[ f\left(\frac{Y}{Y_n}\right) - f\left(\frac{Z}{Z_n}\right) \right]$$

$$f(I) = \begin{cases} I^{1/3}, & \text{if } I > (6/29)^3 \\ \left(\frac{841}{108}\right)I + \frac{4}{29}, & \text{if } I \leq (6/29)^3 \end{cases}$$

Where  $(X_n, Y_n, Z_n)$  is coordinate of the white point in CIEXYZ space (in our calculation, it is (0.9504, 1.0000, 1.0889) for the definition of white point in CIE Standard Illuminant D65).

[1] M. Stokes, M. Anderson, S. Chandrasekar, R. Motta, *A Standard Default Color Space for the Internet – sRGB, Version 1.10*, 1996.

[2] J. Schanda, *Colorimetry: Understanding the CIE system* 2007, 61.

## Chemical selectivity and cross-sensitivity of the electrochemical sensors

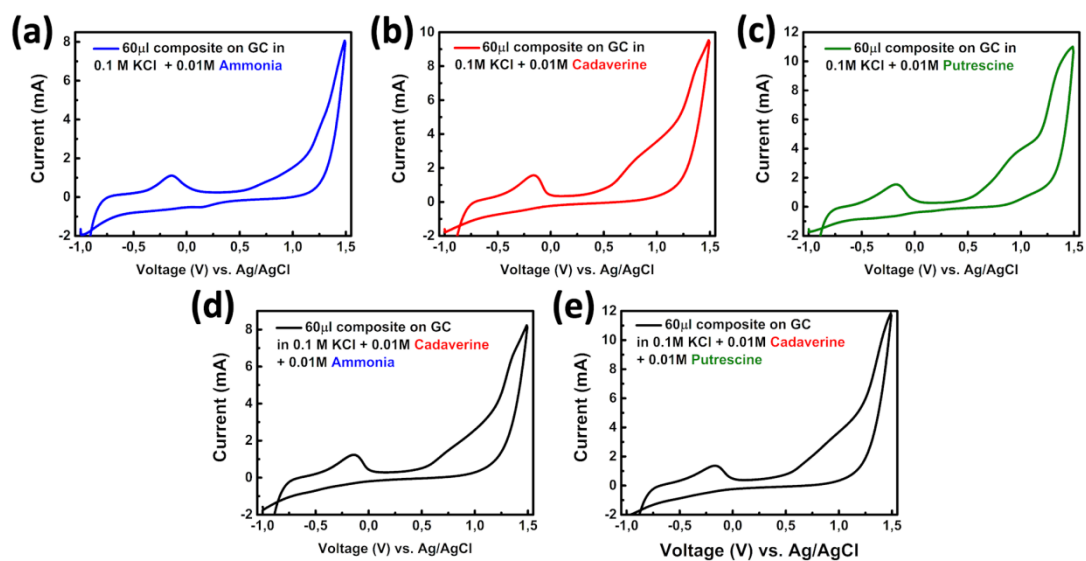

**Figure S1** Cyclic voltammetry curves measured with the composite electrodes using electrolytes consisting of only one (a)-(c) or two different types of amines (d) and (e) in the presence of KCl.
